# Supplementary material for: Synthesis and chiroptical properties of ferrocene-[4]-helicenequinones: kinetic resolution of a planar-chiral diene
Source: Royal Society of Chemistry journal article supplement (doi:10.1039/c1cc12921j), 2011-01-01

## SUPPLEMENTARY INFORMATION FOR

### **Synthesis and Chiroptical Properties of Ferrocene[4]Helicenequinones: Kinetic Resolution of a Planar-Chiral Diene**

Alfonso Latorre, Antonio Urbano,\* M. Carmen Carreño\*

#### **Experimental Procedures**

**General.** Melting points were obtained in open capillary tubes and are uncorrected.  $^1\text{H}$  and  $^{13}\text{C}$  NMR spectra were recorded in  $\text{CDCl}_3$  at 300 and 75 MHz, respectively. UV/Vis spectra were recorded on a Hewlett-Packard 8453 spectrophotometer. The spectra were measured in  $\text{CH}_2\text{Cl}_2$  in a quartz cuvette (1 cm) at 298 °K. Circular dichroism spectra were measured with a JASCO J-810 spectropolarimeter. All reactions were monitored by thin layer chromatography that was performed on pre-coated sheets of silica gel 60, and flash column chromatography was done with silica gel 60 (230-400 mesh) of Merck. Eluting solvents are indicated in the text. The apparatus for inert atmosphere experiments was dried by flaming in a stream of dry argon. Ethyl ether,  $\text{CH}_2\text{Cl}_2$ , THF and  $\text{CH}_3\text{CN}$  were dried over  $4\text{\AA}$  molecular sieves. All other reagent quality solvents were used without further purification. For routine workup, hydrolysis was carried out with water, extractions with  $\text{CH}_2\text{Cl}_2$ , and solvent drying with  $\text{MgSO}_4$ .

**(±)-3,4-Ferrocene-1-trifluoromethanesulphonyloxycyclohexene (7).**

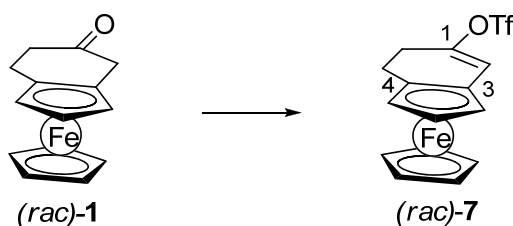

To a solution of 3,4-ferrocenecyclohexanone (*rac*)-**1**<sup>1</sup> (15 mg, 0.06 mmol) and *N*-phenylbis(trifluoromethanesulfonimide) (23 g, 0.06 mmol) in dry THF (2.5 mL) was slowly added a solution of KHMDS 0.5M in THF (155  $\mu$ L, 0.078 mmol) at  $-78$  °C, under argon. The mixture was stirred for 1 h and quenched with H<sub>2</sub>O at  $-78$  °C. After warming to room temperature, workup and flash chromatography with silica deactivated with 10% of water (eluent CH<sub>2</sub>Cl<sub>2</sub>/hexane 1:4), enol triflate (*rac*)-**7** was obtained as an orange oil, in 65% yield: <sup>1</sup>H NMR  $\delta$  2.47-2.93 (m, 4H), 4.17 (broad s, 8H), 6.30 (d,  $J = 2.8$  Hz, 1H); <sup>13</sup>C NMR  $\delta$  22.8, 27.8, 65.9, 66.7, 67.4, 69.8, 76.4, 82.4, 117.7, 146.5; MS (ESI):  $m/z$  (%) 253 (22), 282 (15), 386 (M<sup>+</sup>, 15); HRMS (ESI) calcd. for C<sub>15</sub>H<sub>13</sub>O<sub>3</sub>F<sub>3</sub>FeS (M<sup>+</sup>) 386.1671, found 386.9881.

### ( $\pm$ )-3,4-Ferrocene-1-vinylcyclohexene (**2**).

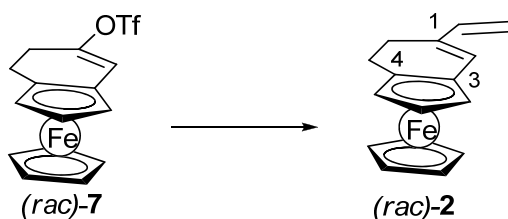

To a mixture of enol triflate (*rac*)-**7** (55 mg, 0.142 mmol), LiCl (28 mg, 0.71 mmol) and Pd(PPh<sub>3</sub>)<sub>4</sub> (9 mg, 5% mol) in THF (1.4 mL), vinyltributylstannane (44  $\mu$ L, 0.142 mmol) was added, under argon. The reaction mixture was heated at 90 °C for 45 min, filtered over celite and washed with water. After workup and flash chromatography (eluent CH<sub>2</sub>Cl<sub>2</sub>/hexane 2:1), diene (*rac*)-**2** was obtained as a red oil, in 58% yield; <sup>1</sup>H NMR  $\delta$  2.31-2.49 (m, 2H), 2.61-2.74 (m, 2H), 4.09 (s, 5H), 4.13 (broad s, 3H), 5.02 (d,  $J = 10.8$  Hz, 1H), 5.25 (d,  $J = 17.4$  Hz, 1H), 6.25 (broad s, 1H), 6.42 (dd,  $J = 10.8$  and 17.4 Hz, 1H); <sup>13</sup>C NMR  $\delta$  22.3, 23.4, 64.6, 66.3, 66.4, 69.5, 79.9, 85.1, 109.9, 126.7, 134.9, 139.2; MS (ESI):  $m/z$  (%) 264 (M<sup>+</sup>, 55); HRMS (ESI) calcd. for C<sub>16</sub>H<sub>16</sub>Fe (M<sup>+</sup>) 264.0601 found 264.0595.

### Representative Procedure for Kinetic Resolutions

To a solution of diene (*rac*)-**2** (33 mg, 0.12 mmol) in CH<sub>2</sub>Cl<sub>2</sub> (7.6 mL) at  $-78$  °C, a solution of (*SS*)-5-methyl-2-(*p*-tolylsulfinyl)-1,4-benzoquinone (**3**)<sup>2</sup> (see Table for conditions) in CH<sub>2</sub>Cl<sub>2</sub> (7.6 mL)

(1) S. Siegel, H. G. Schmalz, *Angew. Chem., Int. Ed. Engl.*, 1997, **36**, 2456–2458.

(2) M. C. Carreño, J. L. García Ruano, A. Urbano, *Synthesis*, 1992, 651–653.

was rapidly added under argon. The reaction was slowly warmed up to room temperature and the solvent eliminated. After flash chromatography (eluent CH<sub>2</sub>Cl<sub>2</sub>), unreacted optically active diene (*pR*)-**2** (see Table for yields and optical purities) and tetracyclic ferrocene (*pS,S,P*)-**4** (see Table for yields and optical purities), were respectively obtained.

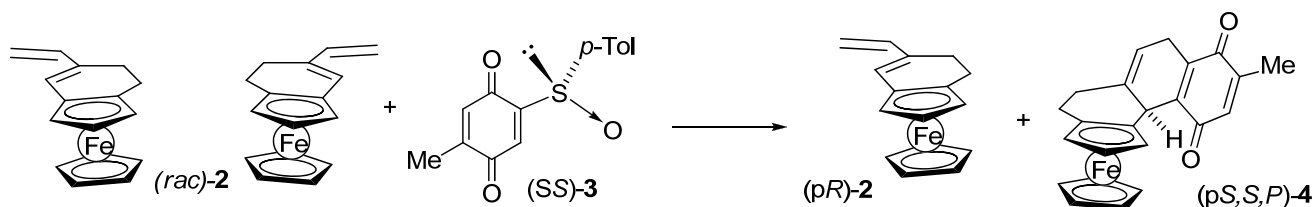

| entry | T<br>(° C) | ( <i>SS</i> )- <b>3</b><br>(equiv) | ( <i>pR</i> )- <b>2</b><br>(% yield / % <i>ee</i> ) | ( <i>pS,S,P</i> )- <b>4</b><br>(% yield / % <i>ee</i> ) |
|-------|------------|------------------------------------|-----------------------------------------------------|---------------------------------------------------------|
| 1     | -78 to rt  | 2.0                                |                                                     | (56 / 55)                                               |
| 2     | -78 to rt  | 0.5                                | (50 / 63)                                           | (34 / <b>93</b> )                                       |
| 3     | -78 to rt  | 0.9                                | (28 / <b>99</b> )                                   | (46 / 73)                                               |
| 4     | -10        | 0.5                                | (32 / 47)                                           | ( <b>45</b> / <b>97</b> )                               |

### (*pR*)-3,4-Ferrocene-1-vinylcyclohexene (**2**).

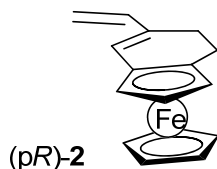

Compound (*pR*)-**2** (99% *ee*)<sup>3</sup> was obtained from kinetic resolution of diene (*rac*)-**2** with 0.9 equiv of (*SS*)-**4** (entry 3), as a red oil, in 28% yield:  $[\alpha]_{\text{D}}^{20} = -1455$  (*c* 0.022, CHCl<sub>3</sub>).

(3) The enantiomeric excess of optically active diene (*pR*)-**2** was determined from optical purity of tricyclic ferrocenyl diester (*pR*)-**5** (see below).

**(pS,10aS,P)-9,10-Ferrocene-3-methyl-5,7,8,10a-tetrahydrophenantrene-1,4-quinone (4)**

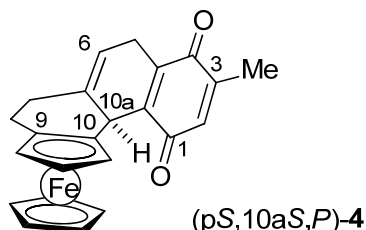

Compound (pS,10aS,P)-4 (97% *ee*)<sup>4</sup> was obtained from kinetic resolution of diene (*rac*)-2 with 0.5 equiv of (*SS*)-3 at -10 °C for 3 h, as a dark blue solid, in 45% yield: m.p. 270 °C; <sup>1</sup>H NMR δ 2.04 (d, *J* = 1.5 Hz, 3H), 2.37-2.54 (m, 2H), 2.68-2.89 (m, 2H), 2.94-3.15 (m, 2H), 3.68 (broad s, 1H), 3.91 (dd, *J* = 2.4 and 2.5 Hz, 1H), 3.95 (m, 1H), 4.22 (s, 5H), 4.9 (t, *J* = 6.7 Hz, 1H), 5.49 (broad s, 1H), 6.66 (d, *J* = 1.5 Hz, 1H); <sup>13</sup>C NMR δ 15.7, 25.2, 28.4, 32.5, 36.0, 65.2, 66.0, 66.8, 70.3, 84.4, 88.0, 114.6, 133.3, 136.1, 136.5, 138.7, 140.6, 145.1, 188.0 (2C).

**(pR)-Dimethyl 7,8-ferrocene-5,6-dihydronaphthalene-1,2-dicarboxylate (5).**

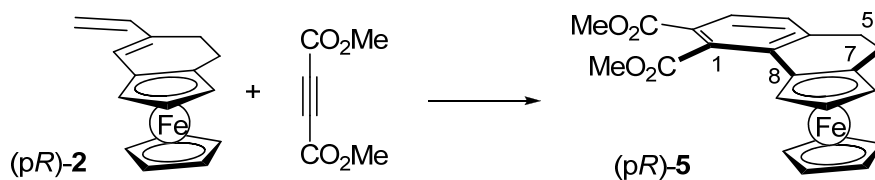

To a solution of diene (pR)-2 (99% *ee*, 15 mg, 0.056 mmol) in toluene (1.5 mL), dimethyl acetylenedicarboxylate (40 μL, 6 mmol) was added. The reaction mixture was heated to 110 °C for 3 h and the solvent evaporated. The residue was solved in CH<sub>2</sub>Cl<sub>2</sub> (7.5 mL) and DDQ (10 mg, 0.045 mmol) was added. The reaction mixture was stirred for 15 min and washed with a saturated aqueous solution of sodium bicarbonate. After workup and flash chromatography (eluent hexane/EtOAc 1:1), pure tricyclic ferrocenyl diester (pR)-5 was obtained as a yellow solid, in 63% yield: mp 134-135 °C; [ $\alpha$ ]<sub>D</sub><sup>20</sup> = +283 (*c* 0.012, CHCl<sub>3</sub>), 99% *ee*; <sup>5</sup> <sup>1</sup>H NMR δ 2.34 (ddd, *J* = 5.4, 14.1 and 14.5 Hz, 1H), 2.59 (ddd, *J* = 2.0, 14.1 and 15.6 Hz, 1H), 3.03 (ddd, *J* = 2.0, 5.4 and 15.6 Hz, 1H), 3.32 (ddd, *J* = 6.5, 14.1 and 15.6 Hz, 1H), 3.88 (s, 3H), 4.00 (s, 3H), 4.06 (s, 5H), 4.30-4.31 (m, 2H), 4.51 (broad s, 1H), 7.25 (d, *J* = 7.8 Hz, 1H), 7.80 (d, *J* = 7.8 Hz, 1H); <sup>13</sup>C NMR δ 22.3, 31.8, 52.3, 52.6, 63.1, 67.7, 68.0,

(4) Chiral HPLC: Daicel Chiralpak IA, hexane/2-propanol 90:10; 0.8 mL min<sup>-1</sup>, 254 nm, *R*<sub>t</sub> = 7.3 min, *T* = 25 °C.

(5) Chiral HPLC: Daicel Chiralpak AS-H, hexane/2-propanol 90:10; 0.8 mL min<sup>-1</sup>, 254 nm, *R*<sub>t</sub> = 13.3 min, *T* = 25 °C

69.9, 77.2, 88.2, 125.9, 127.2, 129.1, 131.3, 133.7, 142.4, 166.1, 170.9; MS (ESI):  $m/z$  (%) 404 ( $M^+$ , 100), 405 ( $M^+ + 1$ , 18); HRMS (ESI) calcd. for  $C_{22}H_{20}O_4Fe$  ( $M^+$ ) 404.0712, found 404.0711.

**(p*S*,*M*)-9,10-Ferrocene-3-methyl-7,8-dihydrophenantrene-1,4-quinone (6).**

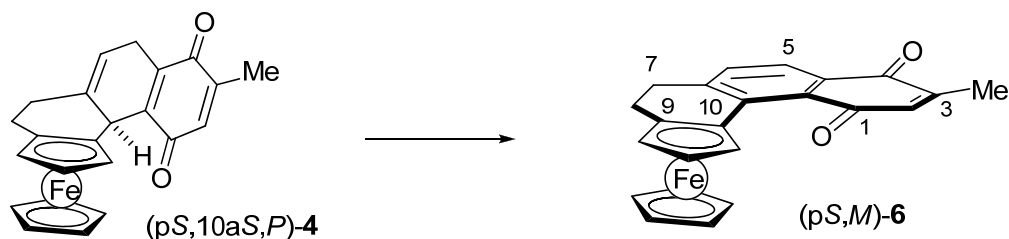

To a solution of tetrahydroaromatic ferrocene (*pS*,10*aS*,*P*)-(4) (97% *ee*, 12 mg, 0.031 mmol) in  $CH_2Cl_2$  (1.2 mL) at room temperature, DDQ (7 mg, 0.031 mmol) was added. The reaction mixture was stirred for 15 min and washed with a saturated aqueous solution of sodium bicarbonate. After workup and flash chromatography, pure dihydroaromatic helical ferrocene (*pS*,*M*)-6 was obtained as a dark green solid, in 72% yield: mp 270 °C;  $\{[\alpha]_D^{20} = +1704$  ( $c = 0.001$  in  $CHCl_3$ ), 97% *ee*;<sup>6</sup>  $^1H$  NMR  $\delta$  2.14 (d,  $J = 1.4$  Hz, 3H), 2.41 (dt,  $J = 5.4$  and 14.0 Hz, 1H), 2.60 (ddd,  $J = 1.9$ , 6.6 and 14.0 Hz, 1H), 3.03 (ddd,  $J = 1.9$ , 5.4 and 16.1 Hz, 1H), 4.67 (d,  $J = 2.2$  Hz, 1H), 6.80 (d,  $J = 1.4$  Hz, 1H), 7.39 (d,  $J = 7.7$  Hz, 1H), 7.89 (d,  $J = 7.7$  Hz, 1H);  $^{13}C$  NMR  $\delta$  15.7, 22.0, 32.5, 67.6, 67.8, 67.9, 70.2, 77.7, 90.7, 124.4, 130.0, 132.3, 133.0, 138.0, 138.7, 145.1, 145.2, 185.4, 186.5; MS (ESI):  $m/z$  (%) 382 ( $M^+$ , 24), 383 ( $M^+ + 1$ , 39); HRMS (ESI) calcd. for  $C_{23}H_{18}FeO_2$  ( $M^+$ ) 382.2328, found 382.0650.

**Bis(-)-camphanate (p*S*,*M*)-8.**

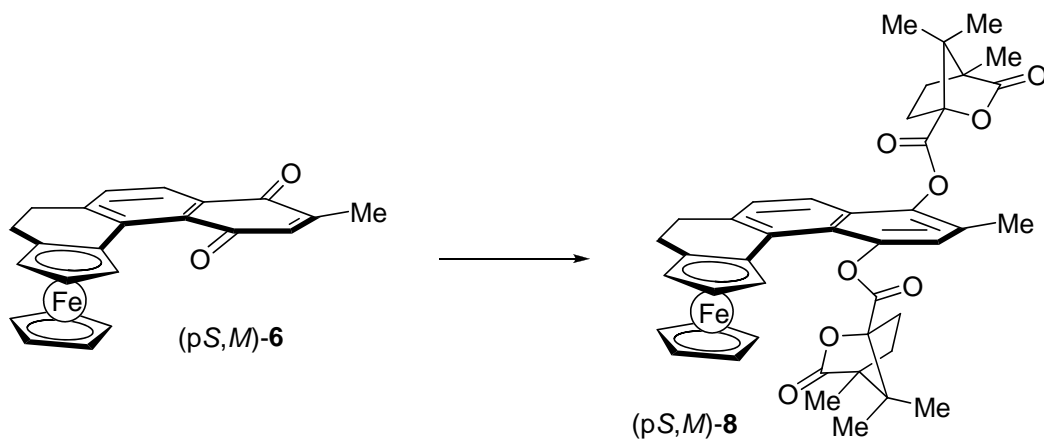

(6) Chiral HPLC: Daicel Chiralpak IA, hexane/2-propanol 90:10; 0.8 mL min<sup>-1</sup>, 254 nm,  $R_t = 11.6$  min,  $T = 25$  °C.

Et<sub>3</sub>N (60 μL) and CH<sub>2</sub>Cl<sub>2</sub> (1 mL) were added to a mixture of dihydroaromatic helical ferrocene (*pS,M*)-**6** (7.7 mg, 0.02 mmol), activated Zn (17 mg, 0.25 mmol), (–)-camphanoyl chloride (22 mg, 0.1 mmol) and DMAP (1.15 mg, 0.01 mmol), under argon. The mixture was refluxed 1.5 h and filtrated through celite, aided by several ethyl acetate washes, to remove remaining Zn. The organic solution was washed with saturated aqueous NaHCO<sub>3</sub>, 2% HCl and water. After workup and flash chromatography (hexane/EtOAc 2:1), the corresponding pure *bis*-(–)-camphanate (*pS,M*)-**8** was obtained as a red solid, in 48% yield; m.p. decomposes over 220 °C; [α]<sub>D</sub><sup>20</sup> = –400 (*c* = 0.028 in CHCl<sub>3</sub>); <sup>1</sup>H NMR δ 0.84 (s, 3H), 1.02 (s, 3H), 1.08 (s, 3H), 1.21 (s, 3H), 1.24 (s, 3H), 1.25 (s, 3H), 1.46-1.60 (m, 2H), 1.72-1.91 (m, 3H), 2.01-2.10 (m, 1H), 2.34 (s, 3H), 2.34-2.42 (m, 2H), 2.56-2.73 (m, 2H), 3.07 (dd, *J* = 4.8 and 16.2 Hz, 1H), 3.43-3.57 (m, 1H), 3.87 (s, 5H), 4.28 (s, 1H), 4.32 (broad s, 1H), 5.00 (broad s, 1H), 6.96 (s, 1H), 7.31 and 7.59 (AB System, *J* = 8.5 Hz, 2H); <sup>13</sup>C NMR (125 MHz) δ 9.7, 9.8, 16.4, 16.6, 16.7, 17.0, 17.2, 20.2, 20.8, 24.5, 29.0, 29.1, 30.4, 31.5, 33.5, 43.7, 53.8, 54.4, 54.5, 55.0, 55.1, 55.2, 90.6, 91.1, 118.4, 121.2, 123.3, 125.3, 128.1, 128.5, 130.9, 142.3, 143.8, 170.0, 172.7, 178.0, 178.5. MS (ESI): *m/z* (%) 744 (M<sup>+</sup>, 61), 745 (M<sup>+</sup>+1, 100); HRMS (ESI) calcd. for C<sub>43</sub>H<sub>44</sub>O<sub>8</sub>Fe (M<sup>+</sup>) 744.6497, found 744.2380.

**(*pR,P*)-9,10-Ferrocene-3-methyl-7,8-dihydrophenantrene-1,4-quinone (6).**

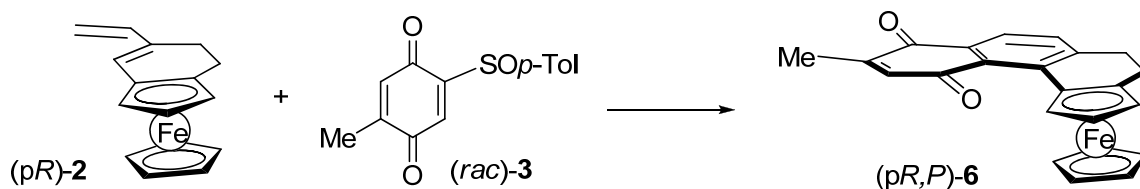

To a solution of diene (*pR*)-**2** (95% *ee*, 8.5 mg, 0.032 mmol) in CH<sub>2</sub>Cl<sub>2</sub>, a solution of (±)-5-methyl-2-(*p*-tolylsulfonyl)-1,4-benzoquinone (*rac*)-**3**<sup>2</sup> (17 mg, 0.062 mmol) in CH<sub>2</sub>Cl<sub>2</sub> (1 mL) was rapidly added, under argon. After stirring for 2 h, DDQ (7.2 mg, 0.032 mmol) was added and the resulting solution was stirred for 15 min and washed with a saturated solution of sodium bicarbonate. After workup and flash chromatography (eluent CH<sub>2</sub>Cl<sub>2</sub>), helical ferrocene (*pR,P*)-**6** was obtained as a dark green solid, in 68% yield: [α]<sub>D</sub><sup>20</sup> = –1660 (*c* = 0.001 in CHCl<sub>3</sub>), 95% *ee*.<sup>7</sup>

(7) Chiral HPLC: Daicel Chiralpak IA, hexane/2-propanol 90:10; 0.8 mL min<sup>-1</sup>, 254 nm, *R*<sub>t</sub> = 10.5 min, *T* = 25 °C

## CHIRAL HPLC

Analysis Method : C:\CHEM32\1\DATA\DEF\_LC 2009-12-16 13-52-07\IA-0,8-10-15.M  
 Last changed : 10/9/2008 4:59:22 PM by Alfonso

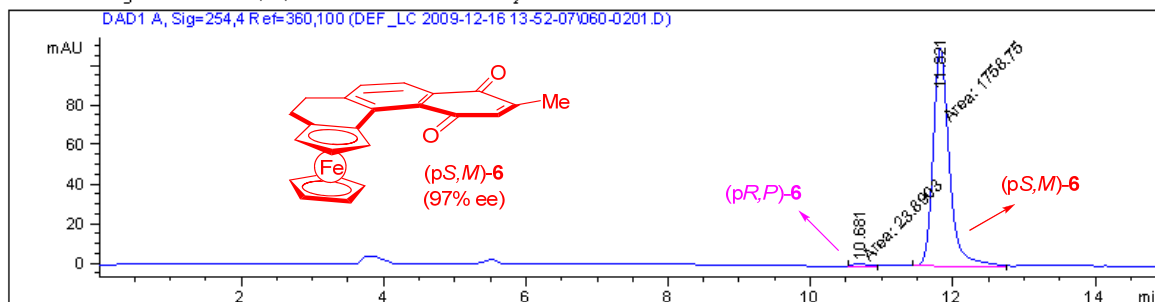

Signal 1: DAD1 A, Sig=254,4 Ref=360,100

| Peak # | RetTime [min] | Type | Width [min] | Area [mAU*s] | Height [mAU] | Area %  |
|--------|---------------|------|-------------|--------------|--------------|---------|
| 1      | 10.681        | MM   | 0.2725      | 23.89025     | 1.46137      | 1.3402  |
| 2      | 11.821        | MM   | 0.2665      | 1758.75159   | 109.97760    | 98.6598 |

Totals : 1782.64184 111.43897

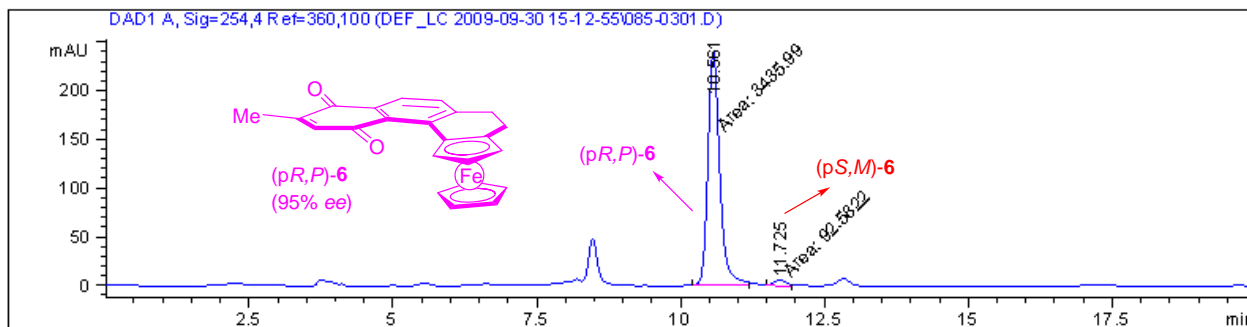

Signal 1: DAD1 A, Sig=254,4 Ref=360,100

| Peak # | RetTime [min] | Type | Width [min] | Area [mAU*s] | Height [mAU] | Area %  |
|--------|---------------|------|-------------|--------------|--------------|---------|
| 1      | 10.561        | MM   | 0.2383      | 3435.99194   | 240.27887    | 97.3762 |
| 2      | 11.725        | MM   | 0.2549      | 92.58223     | 6.05382      | 2.6238  |

Totals : 3528.57417 246.33269

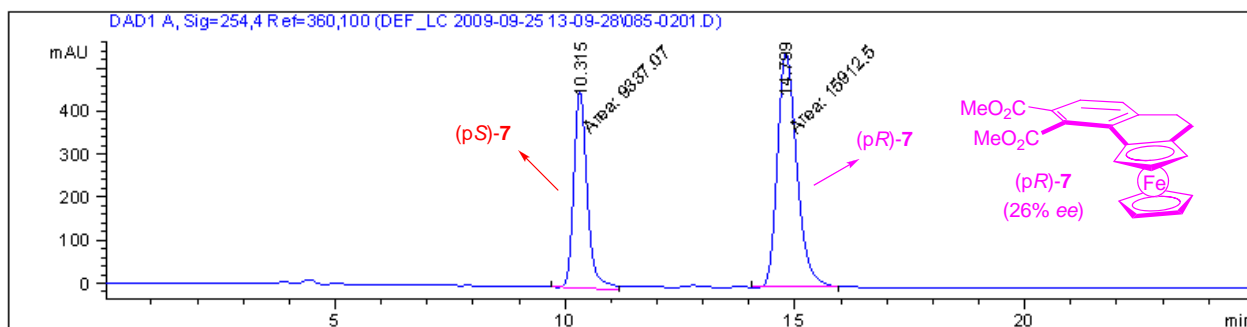

Signal 1: DAD1 A, Sig=254,4 Ref=360,100

| Peak # | RetTime [min] | Type | Width [min] | Area [mAU*s] | Height [mAU] | Area %  |
|--------|---------------|------|-------------|--------------|--------------|---------|
| 1      | 10.315        | MM   | 0.3401      | 9337.07129   | 457.60422    | 36.9791 |
| 2      | 14.799        | MM   | 0.4884      | 1.59125e4    | 542.99731    | 63.0209 |

Totals : 2.52496e4 1000.60153

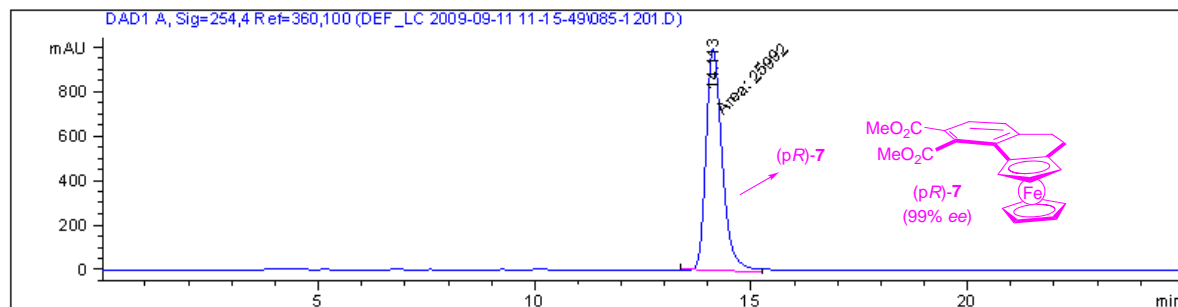

Signal 1: DAD1 A, Sig=254,4 Ref=360,100

| Peak # | RetTime [min] | Type | Width [min] | Area [mAU*s] | Height [mAU] | Area %   |
|--------|---------------|------|-------------|--------------|--------------|----------|
| 1      | 14.113        | MM   | 0.4367      | 2.59920e4    | 991.99371    | 100.0000 |

Totals : 2.59920e4 991.99371



S-9

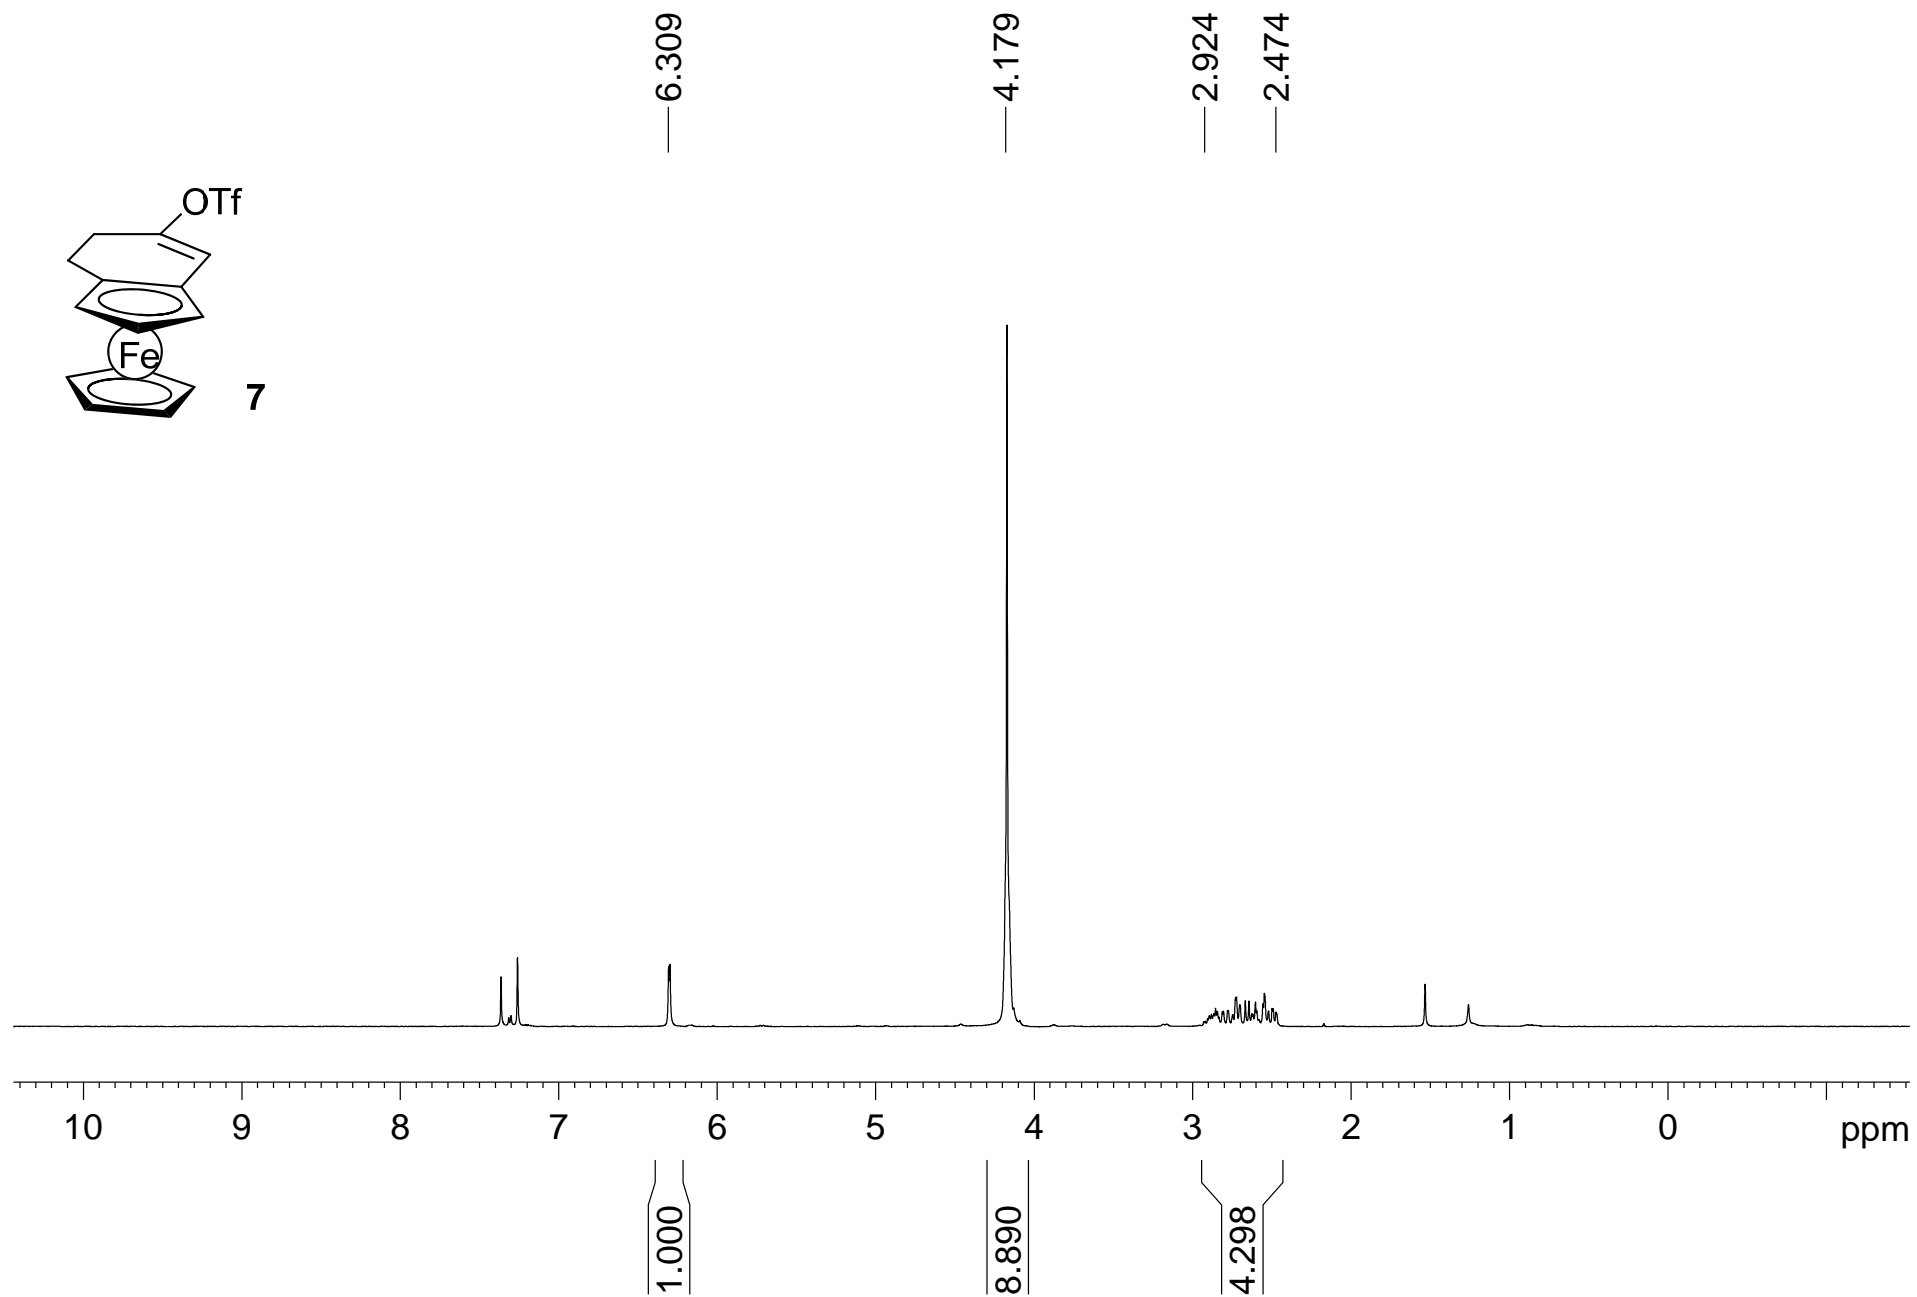

S-10

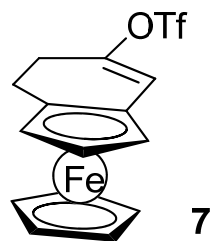

**7**

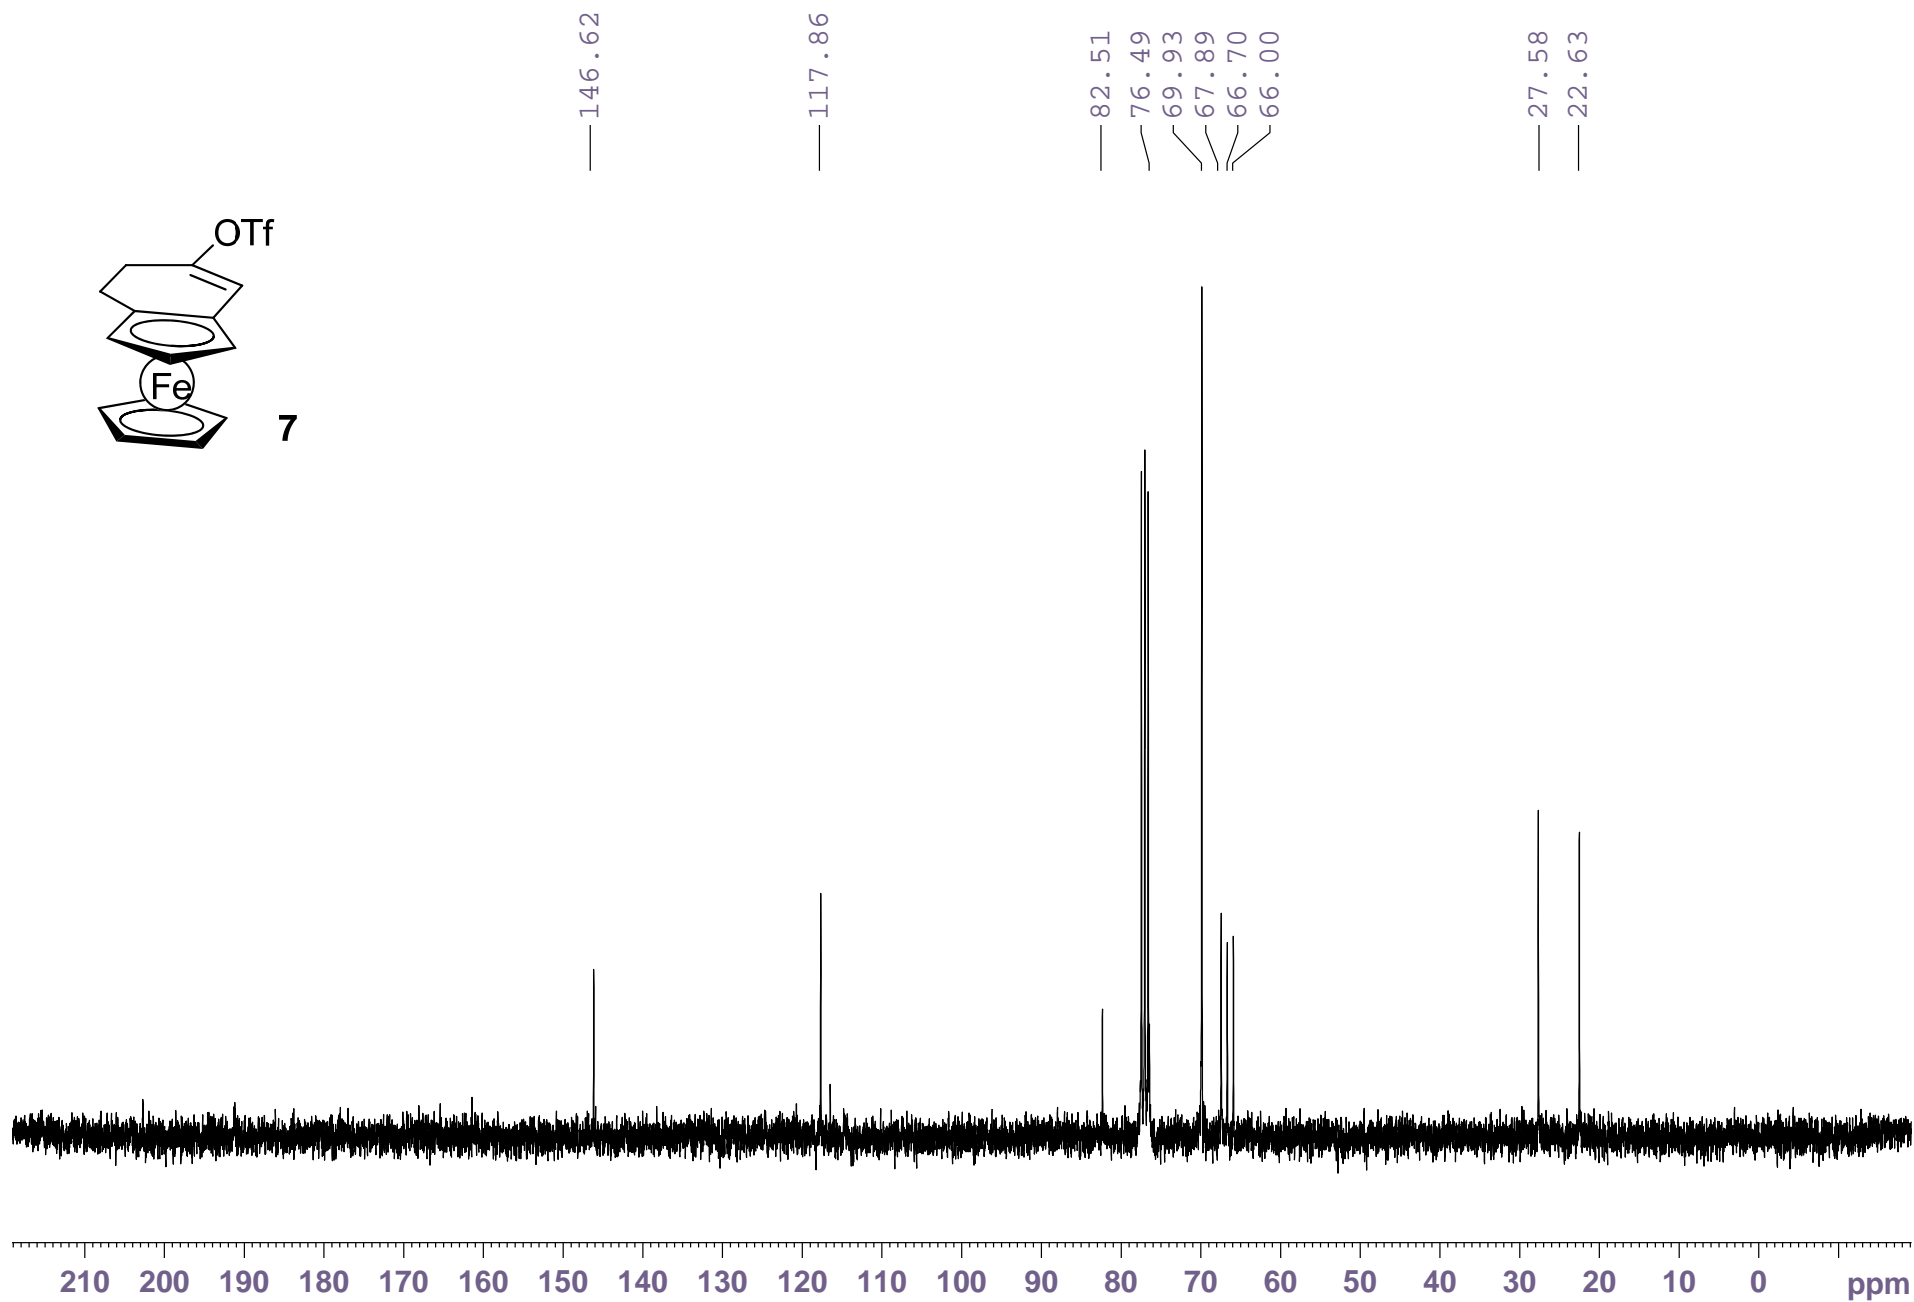

S-11

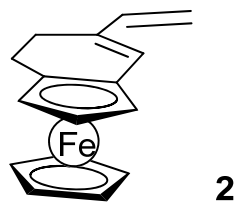

2

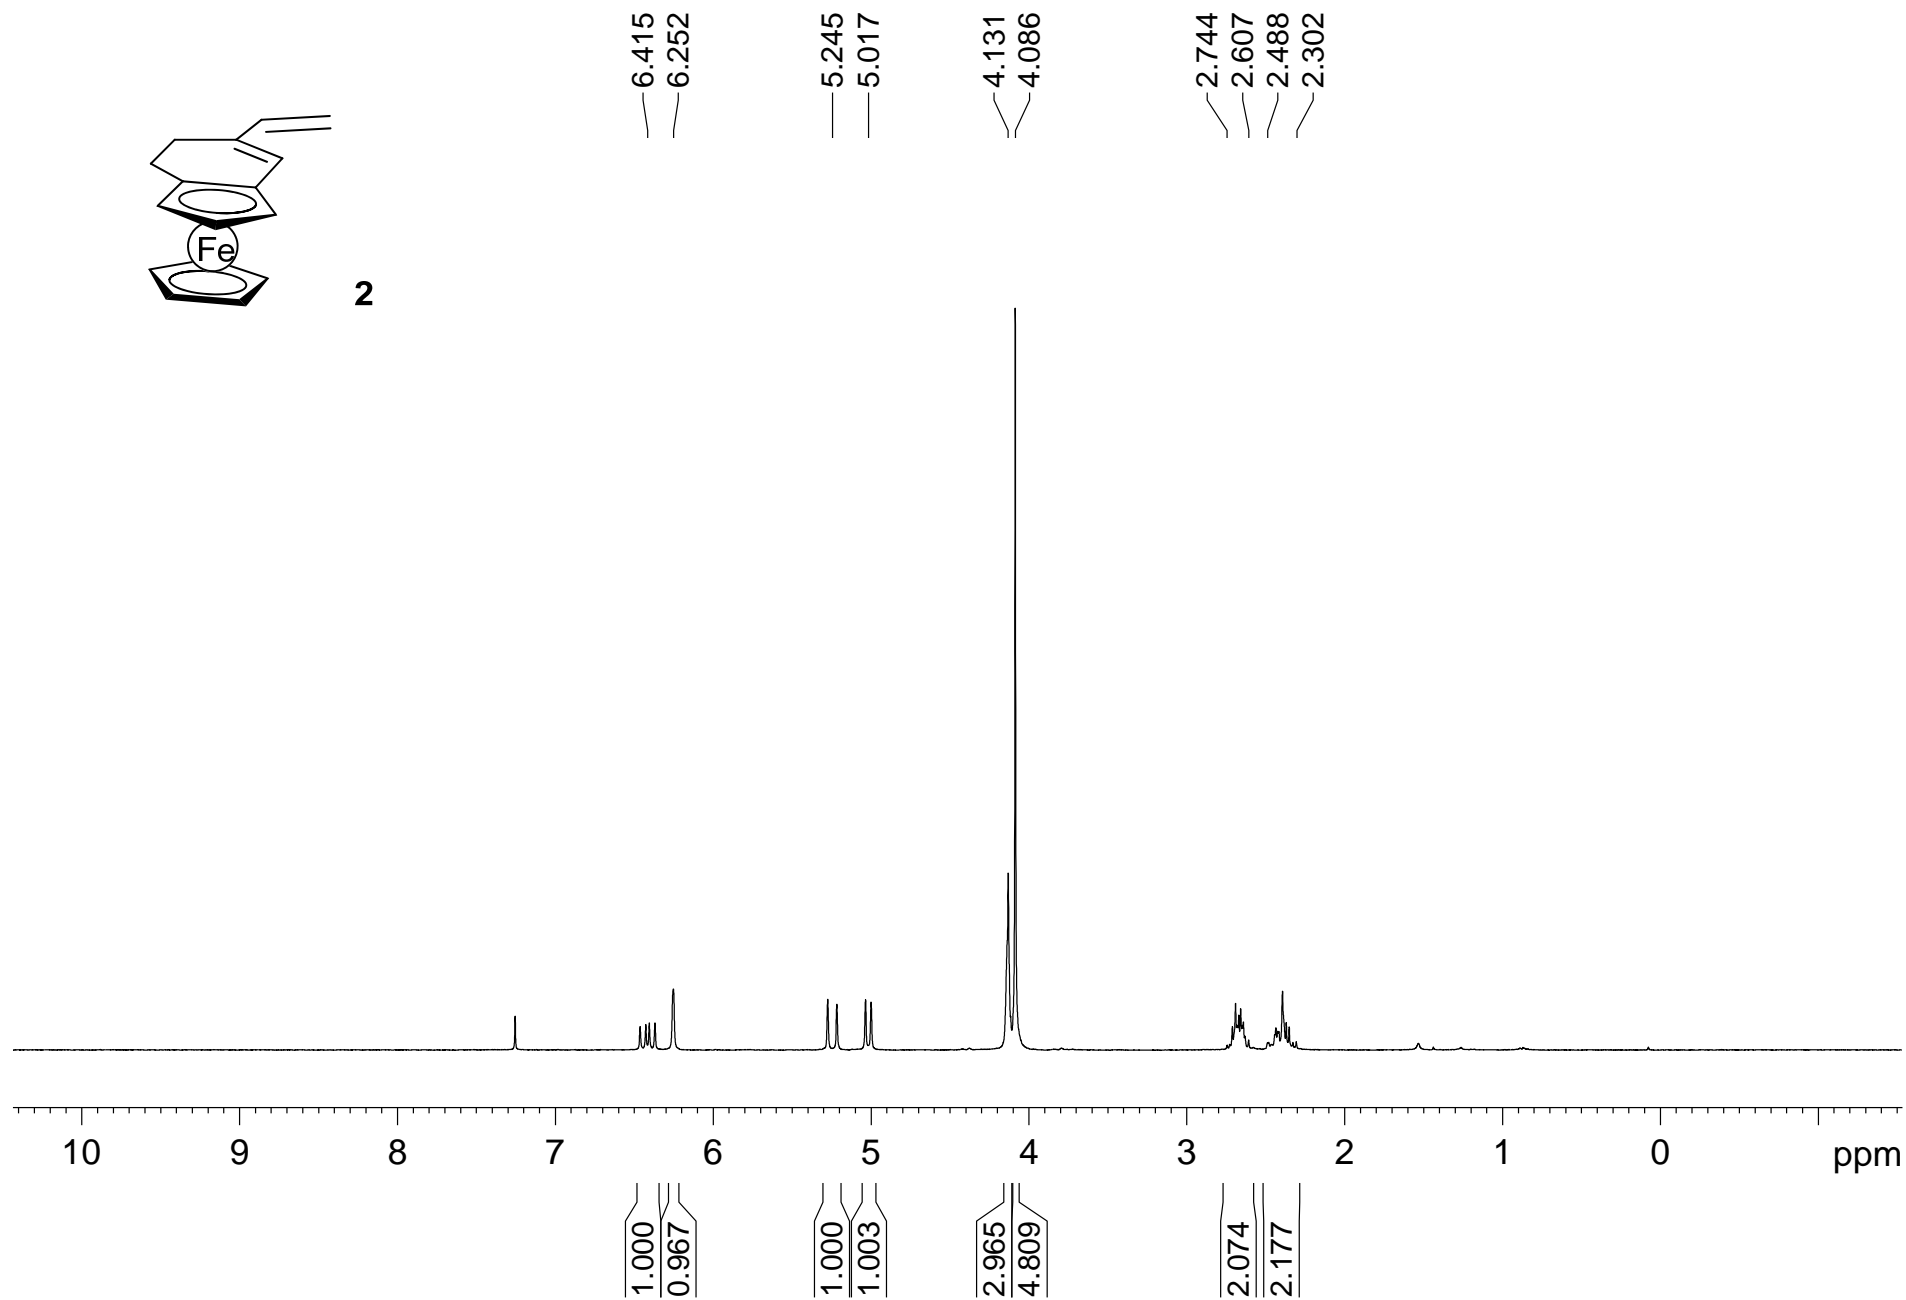

S-12

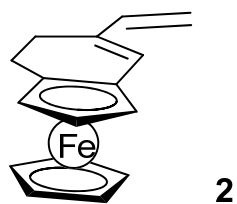

2

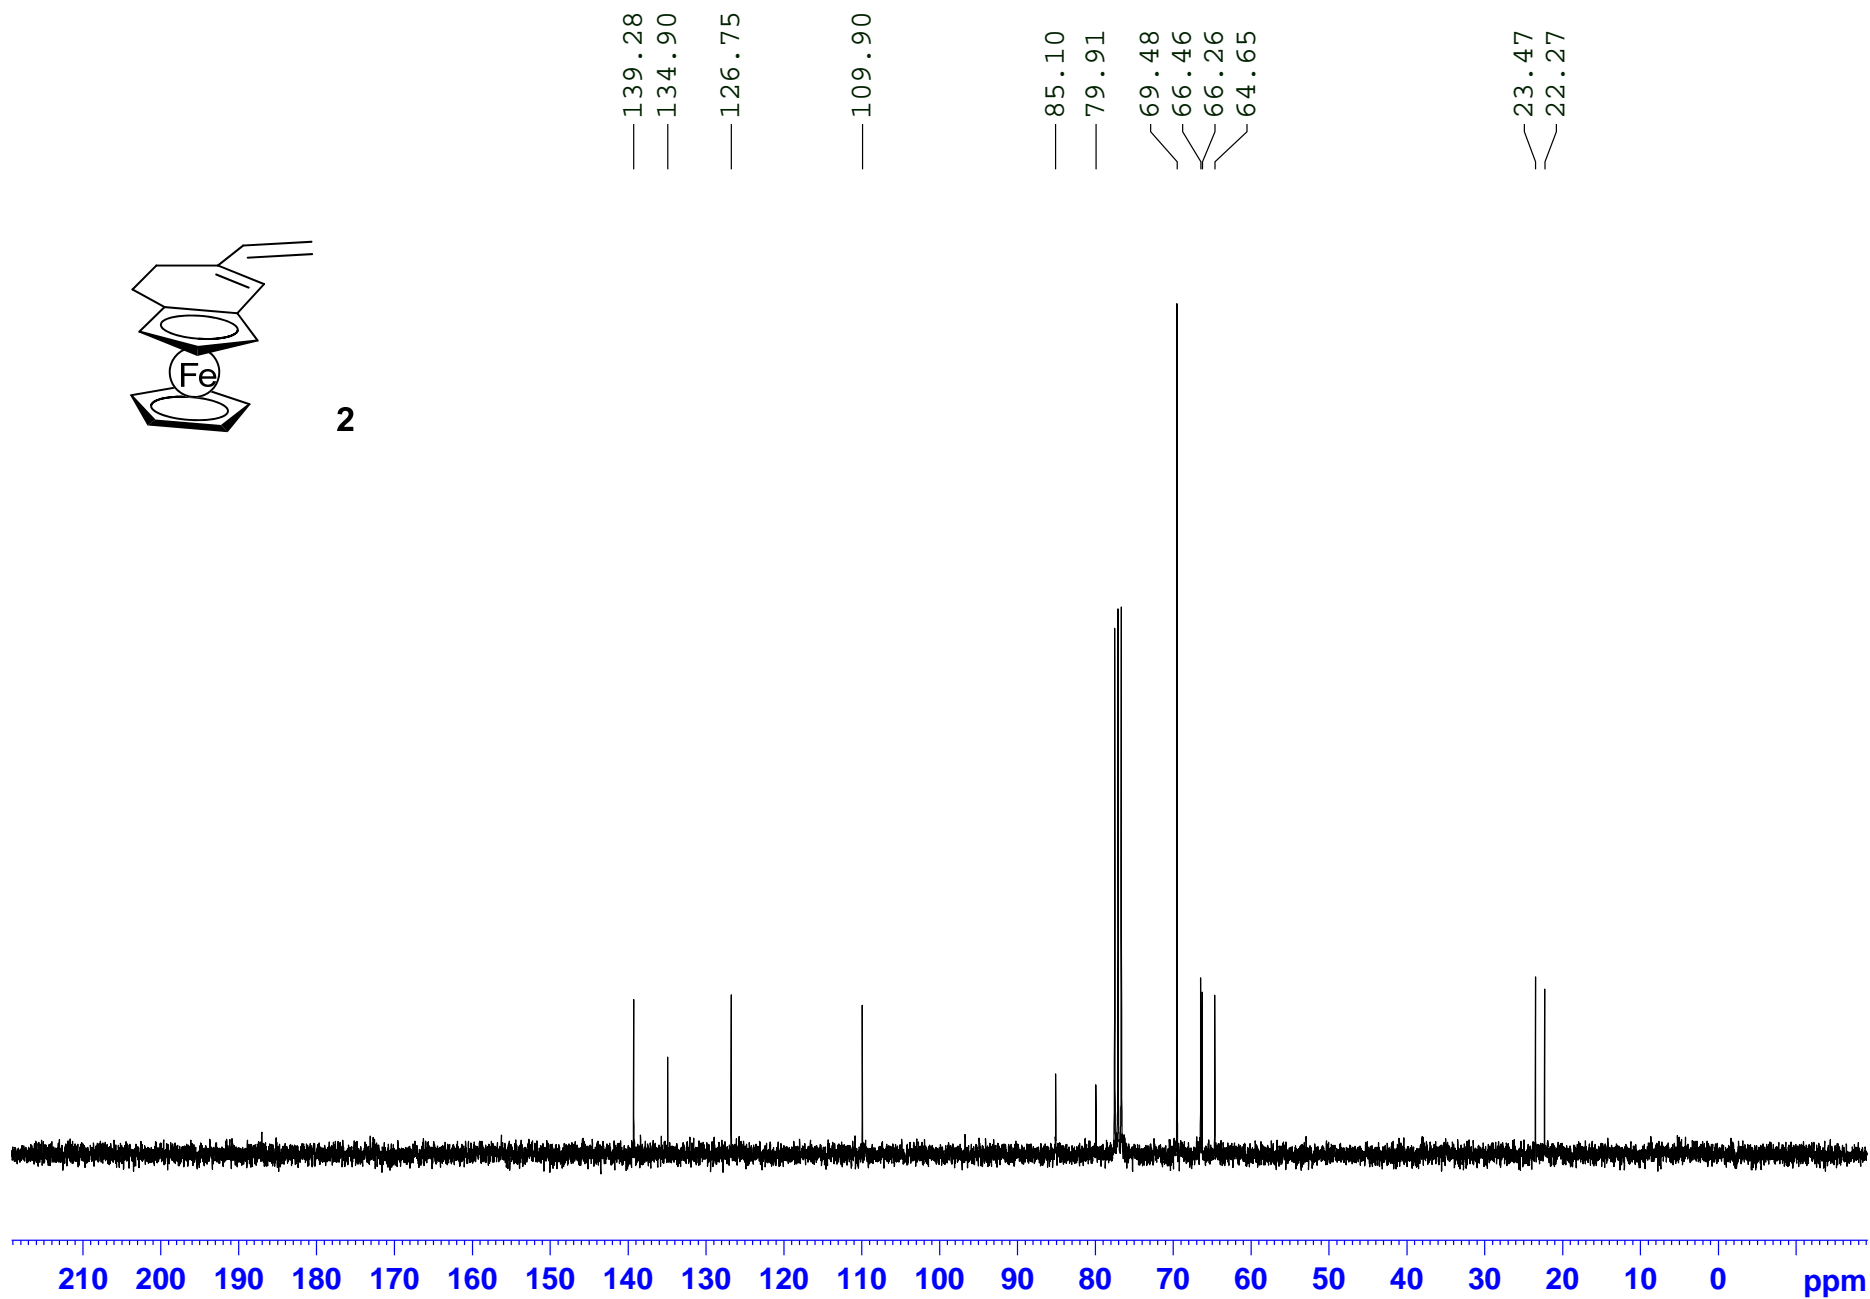

S-13

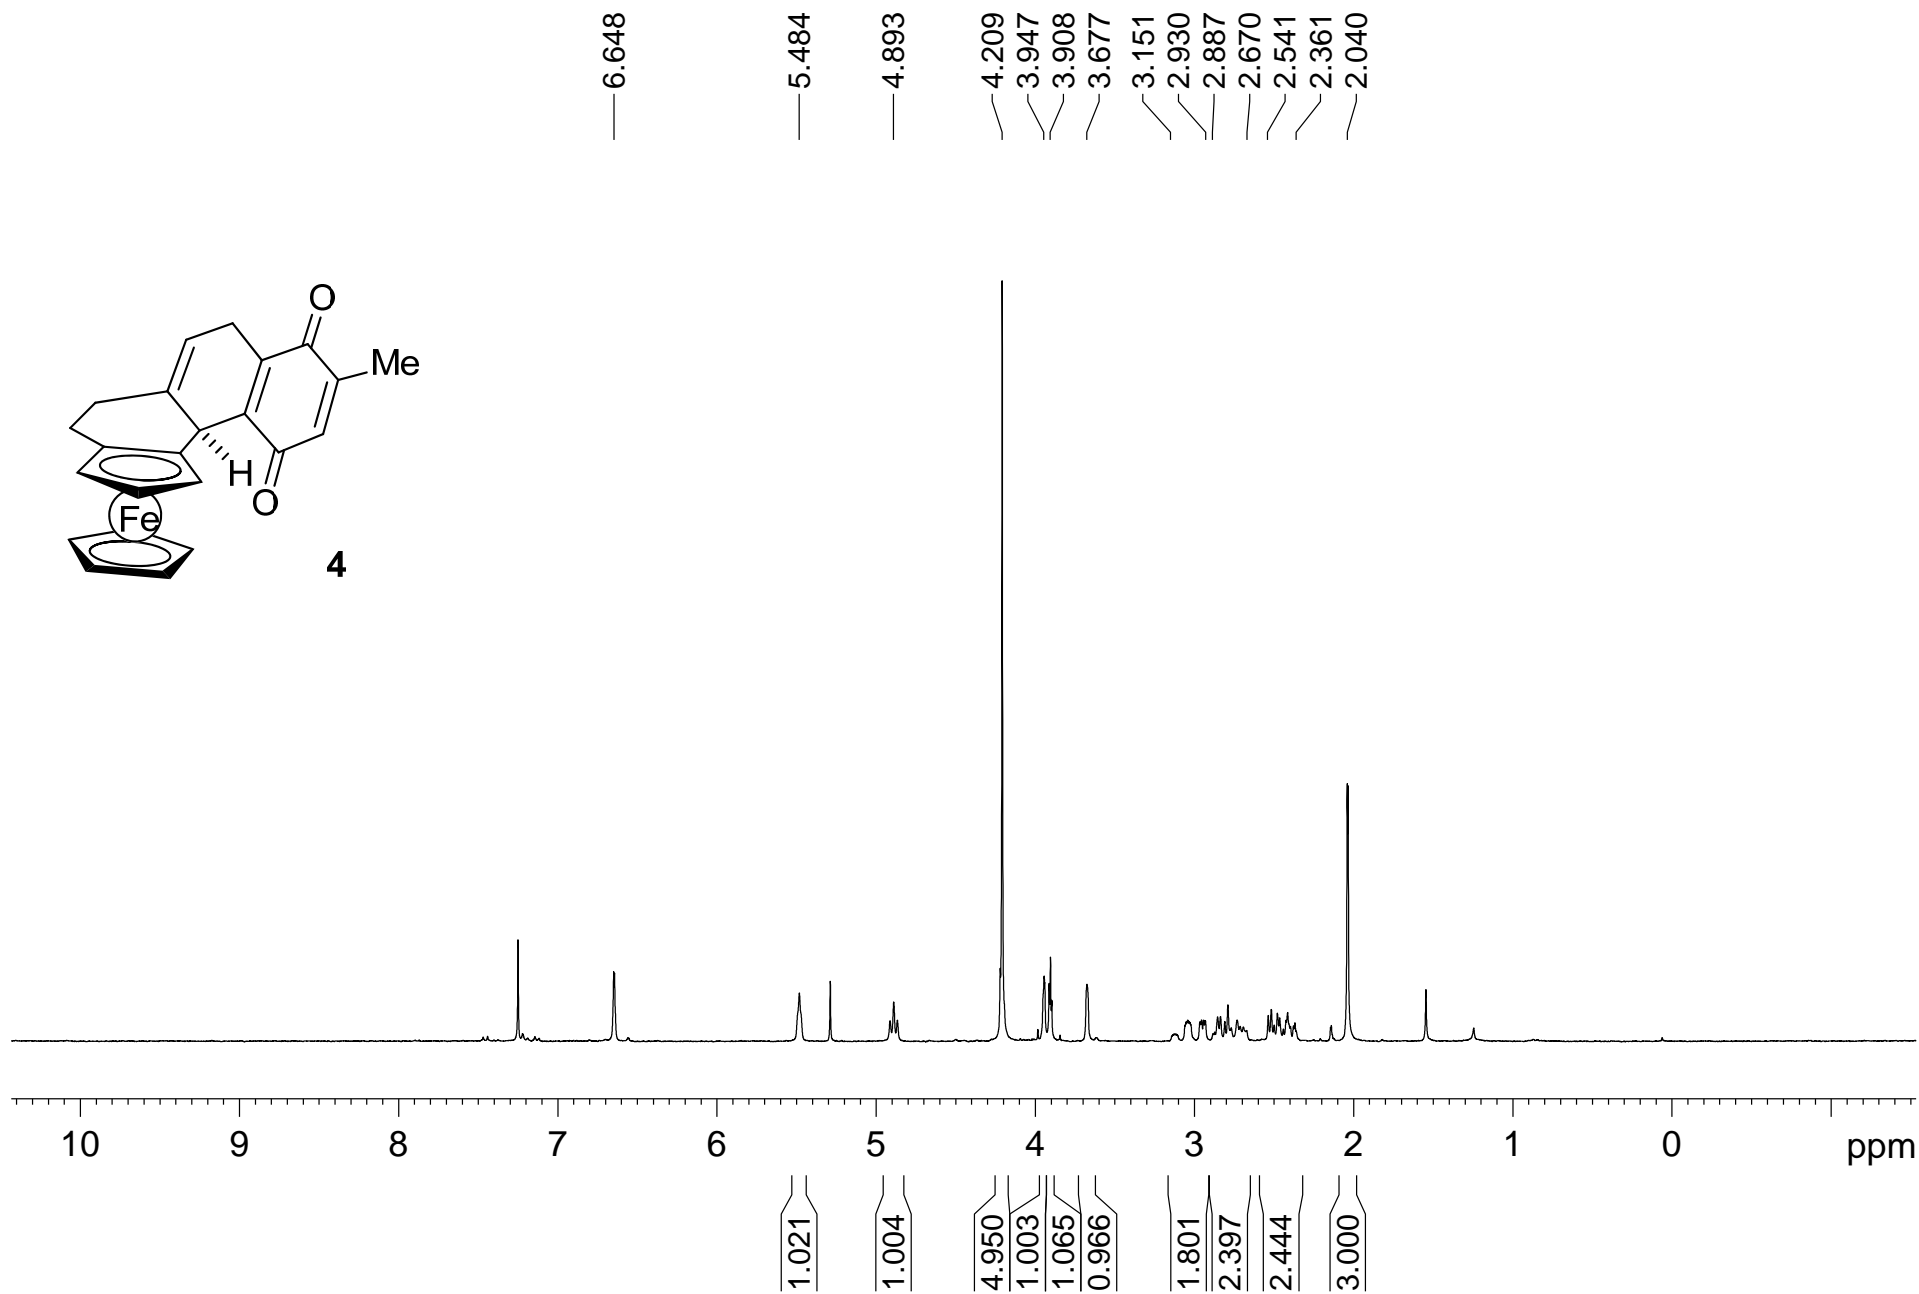

S-14

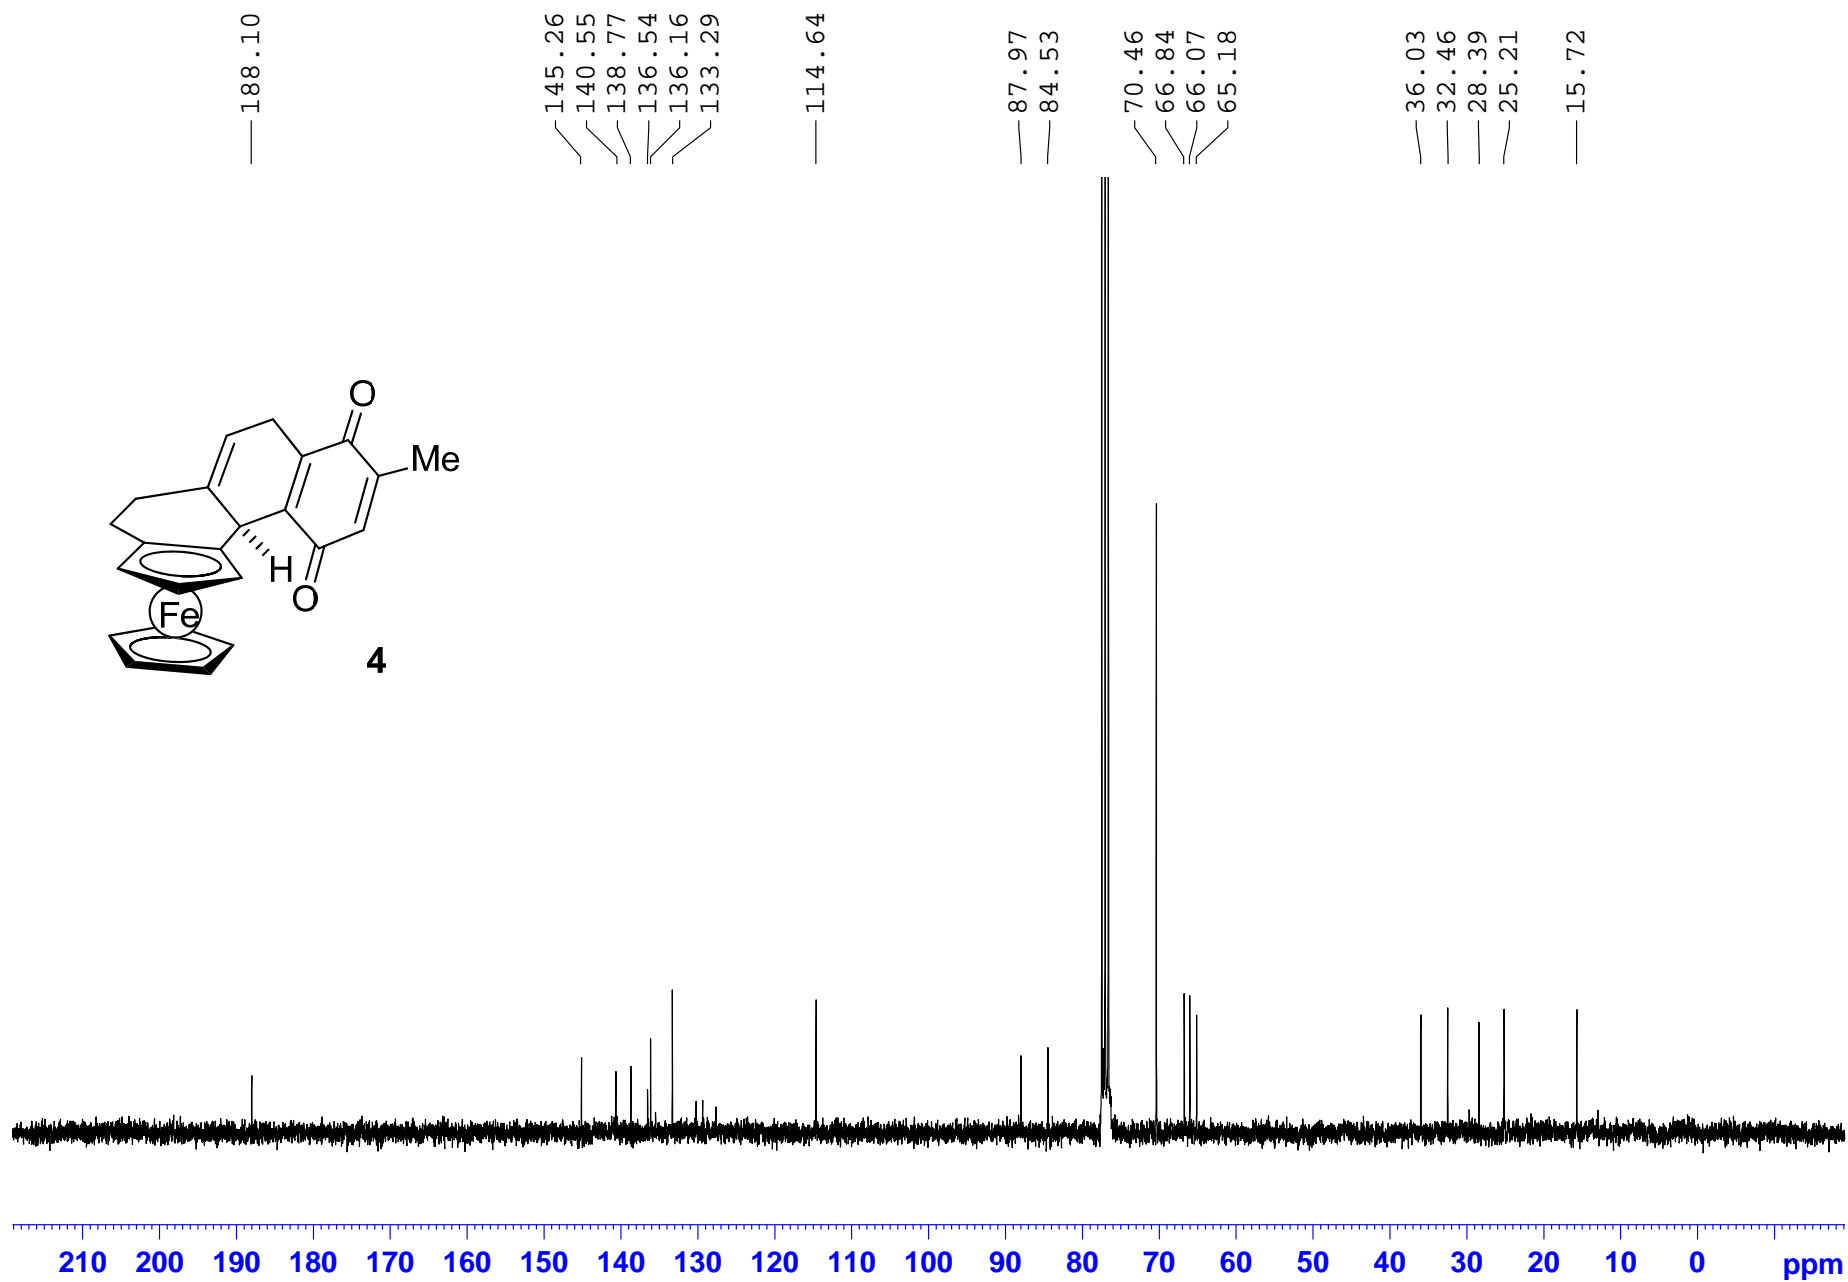

S-15

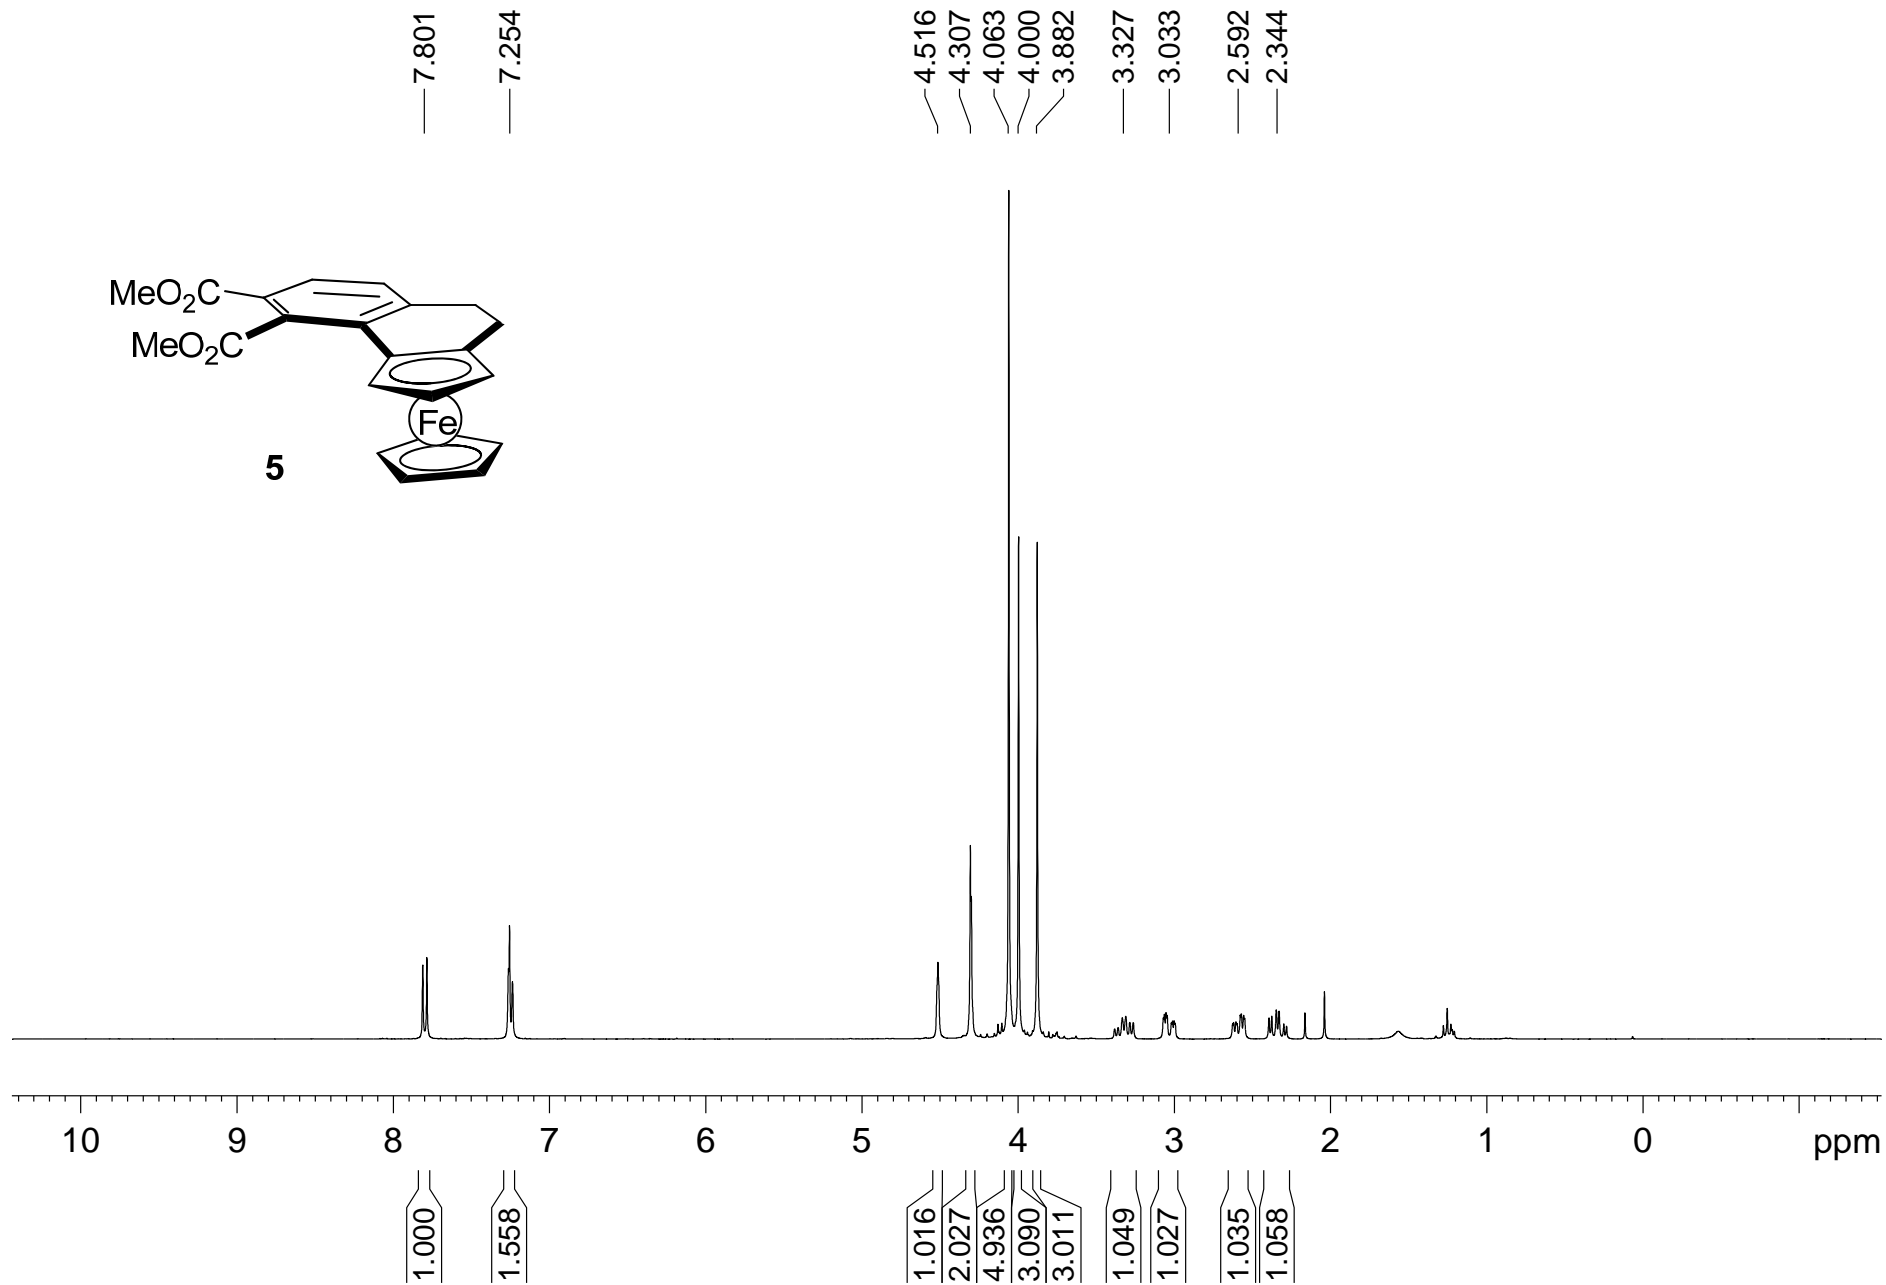

S-16

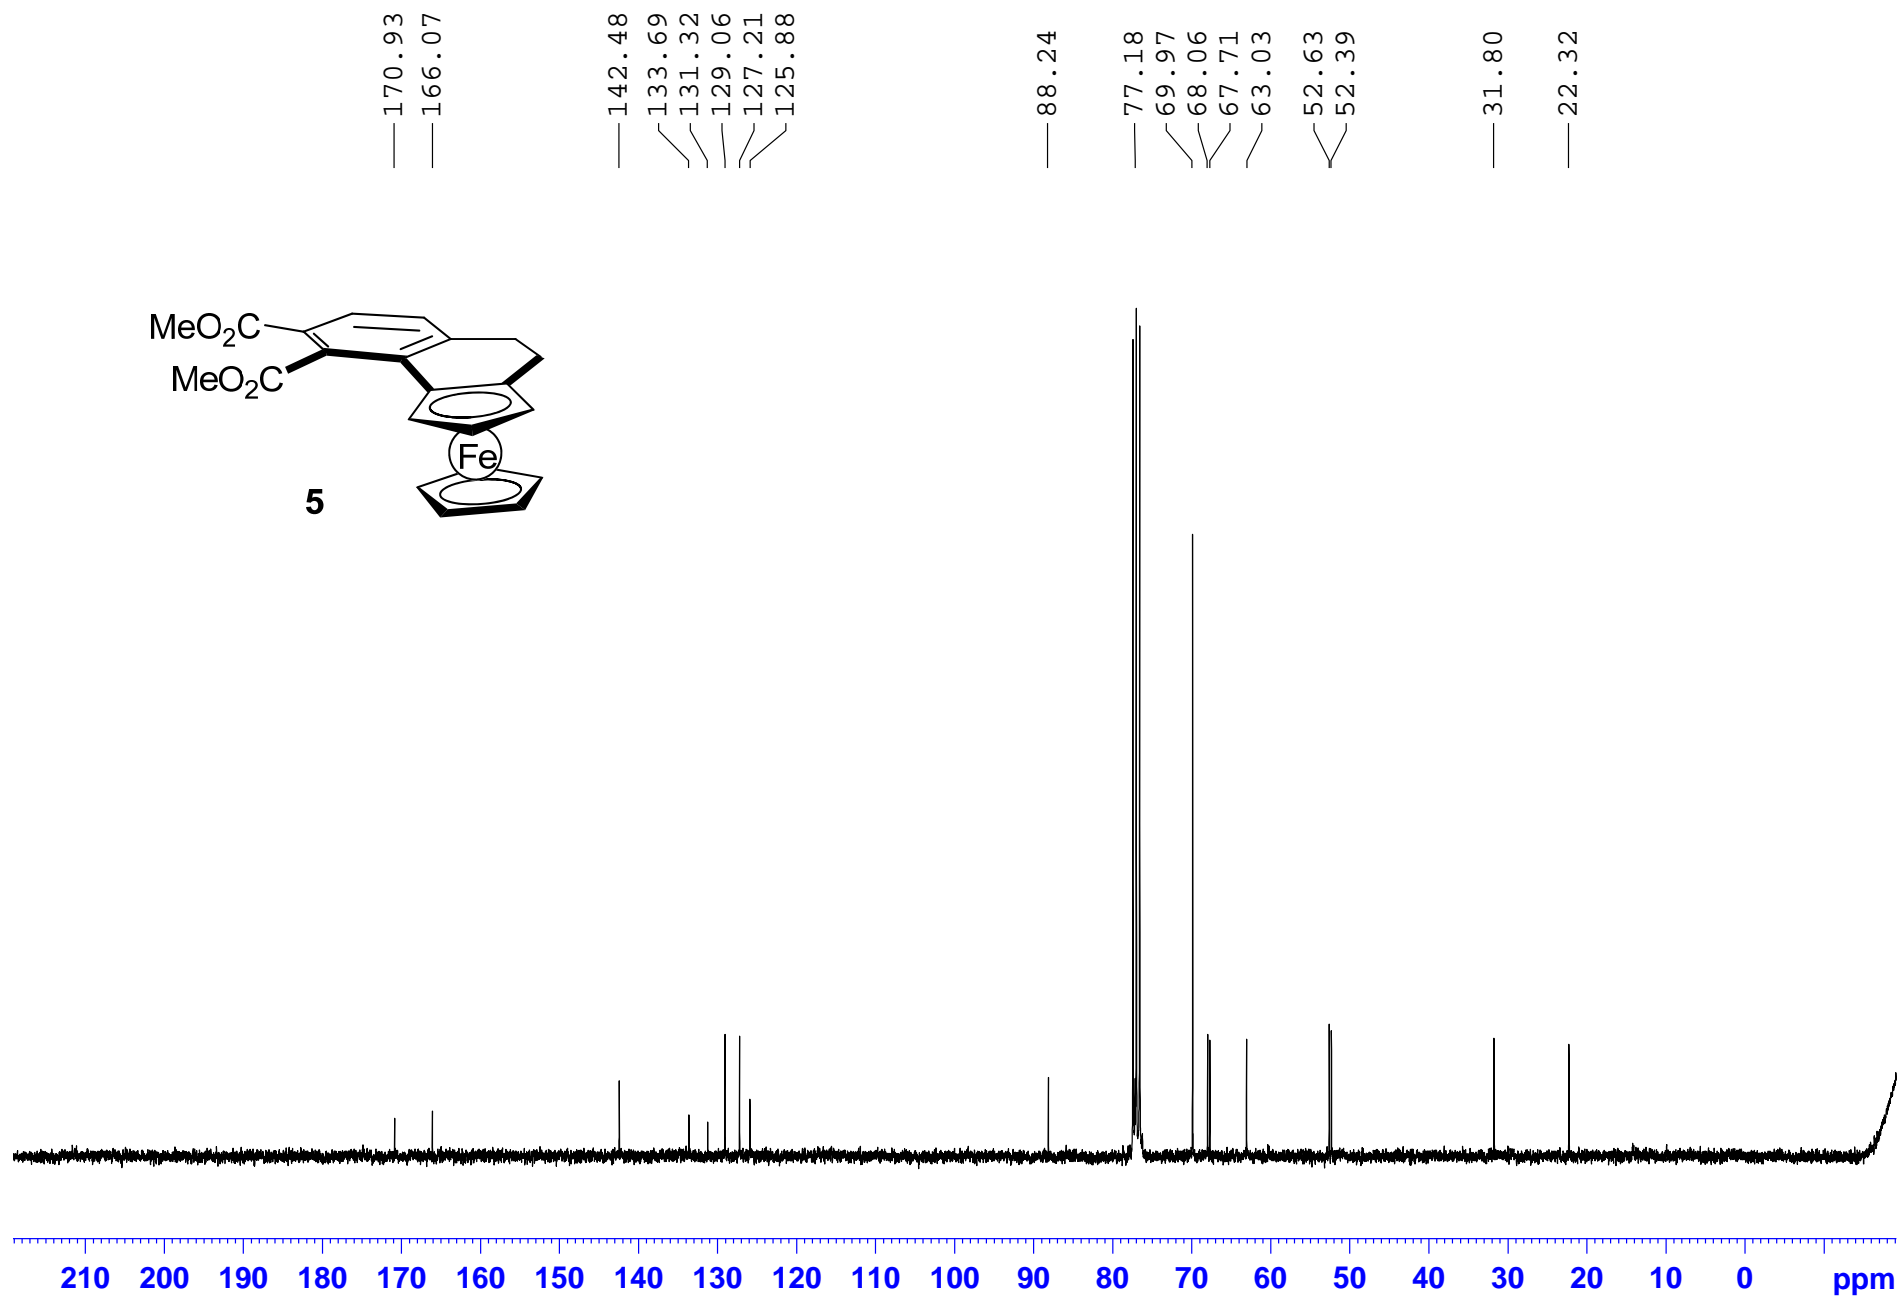



S-17

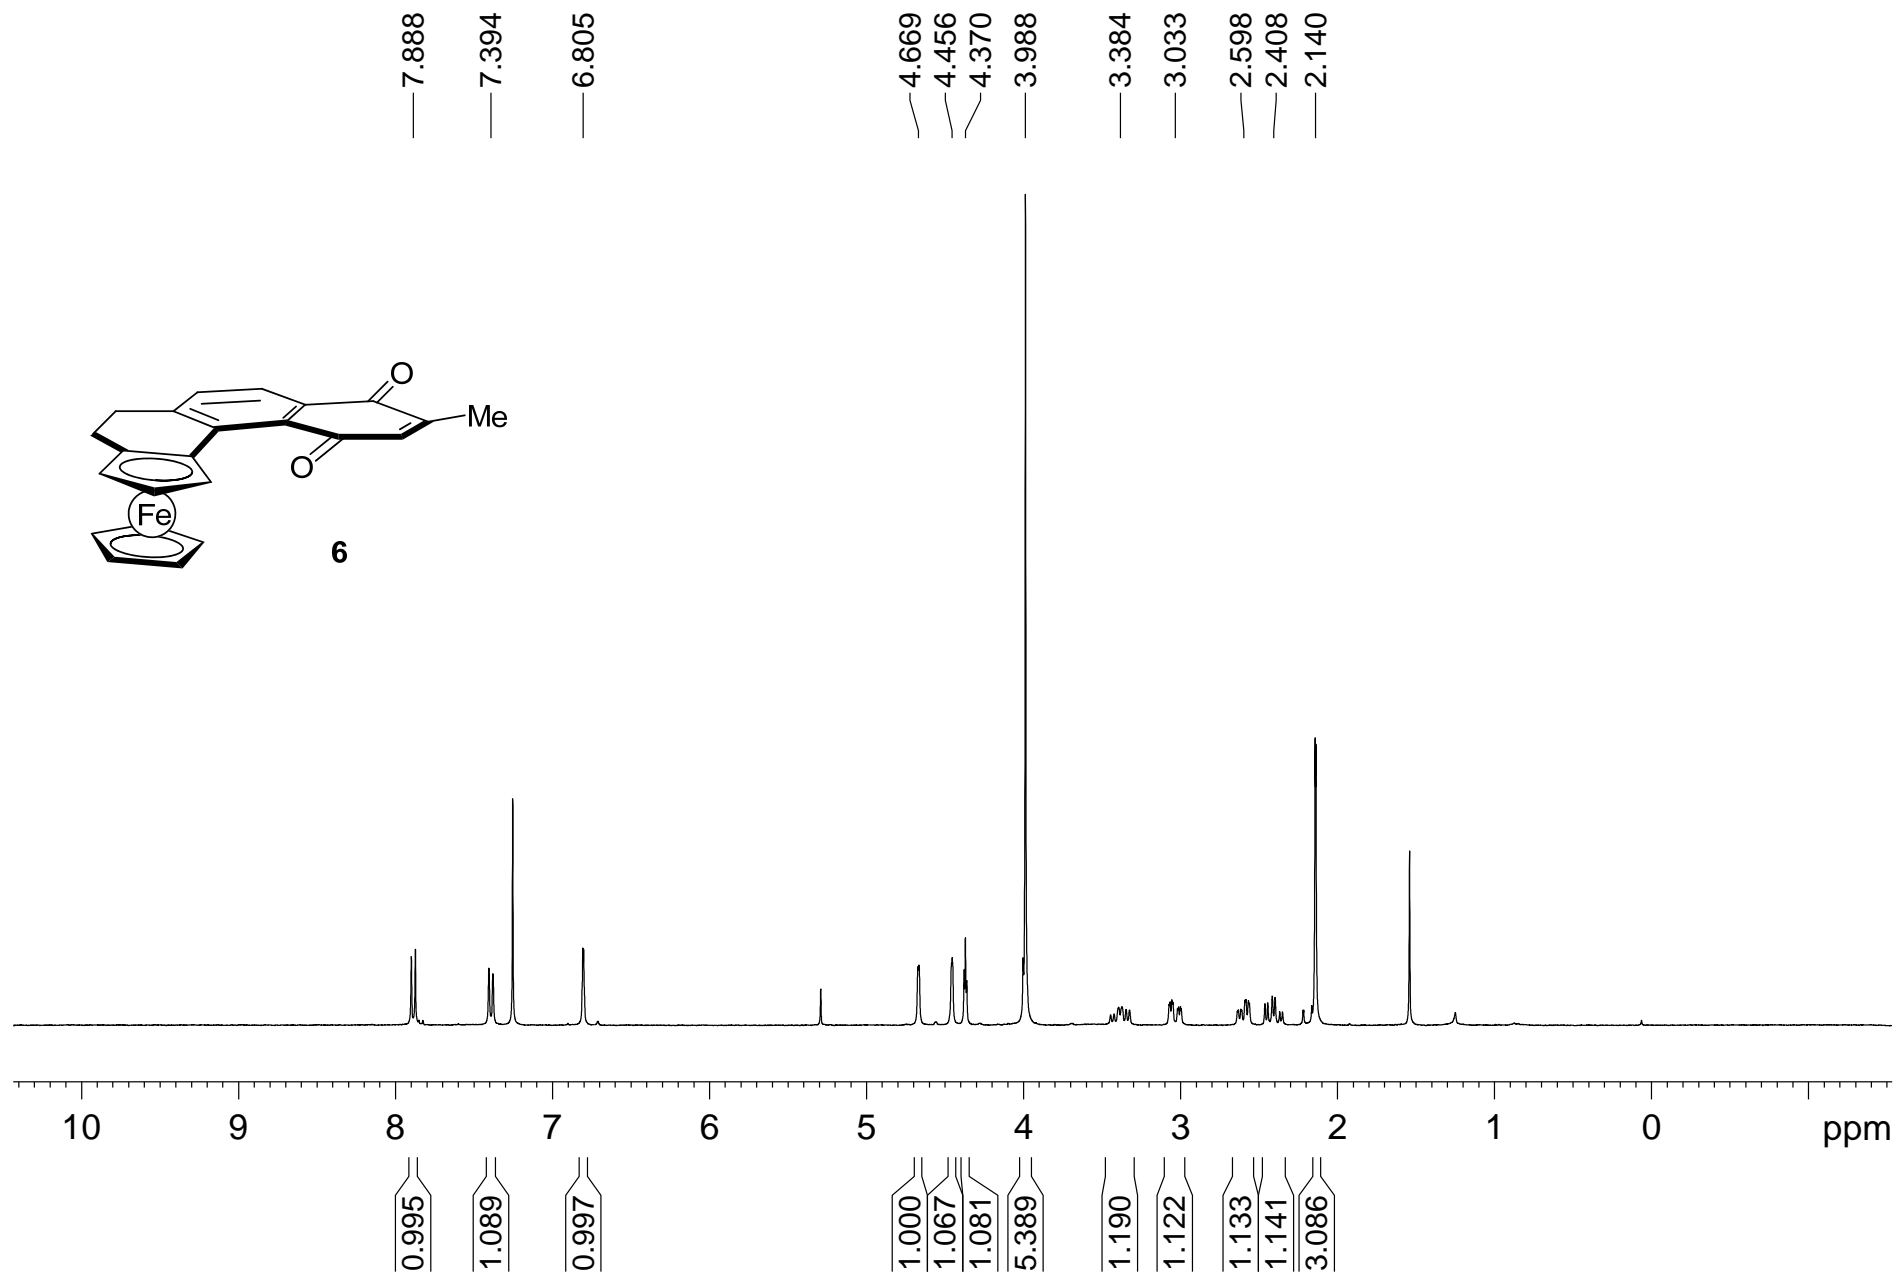

S-18

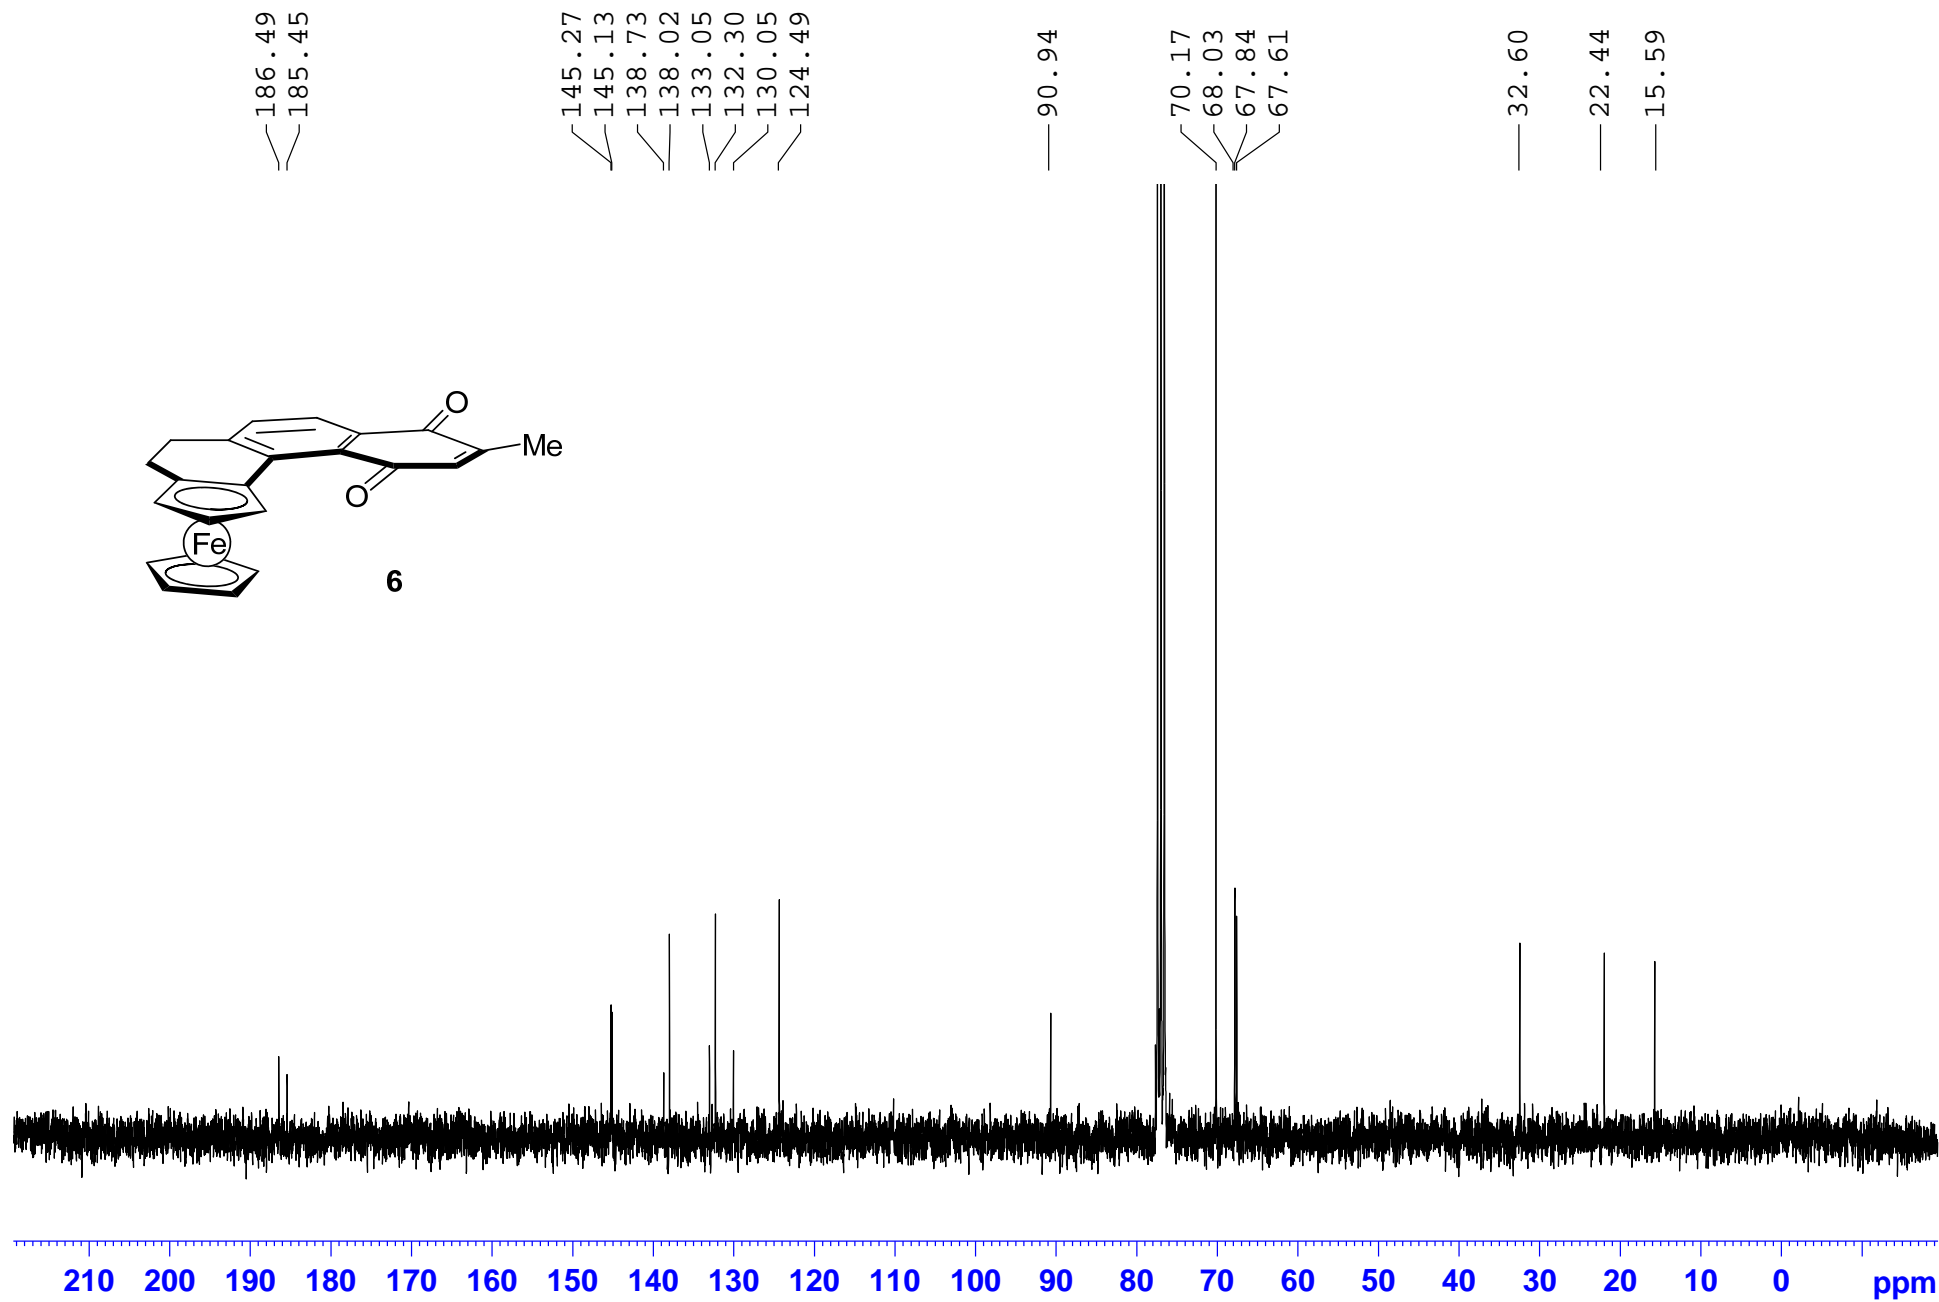

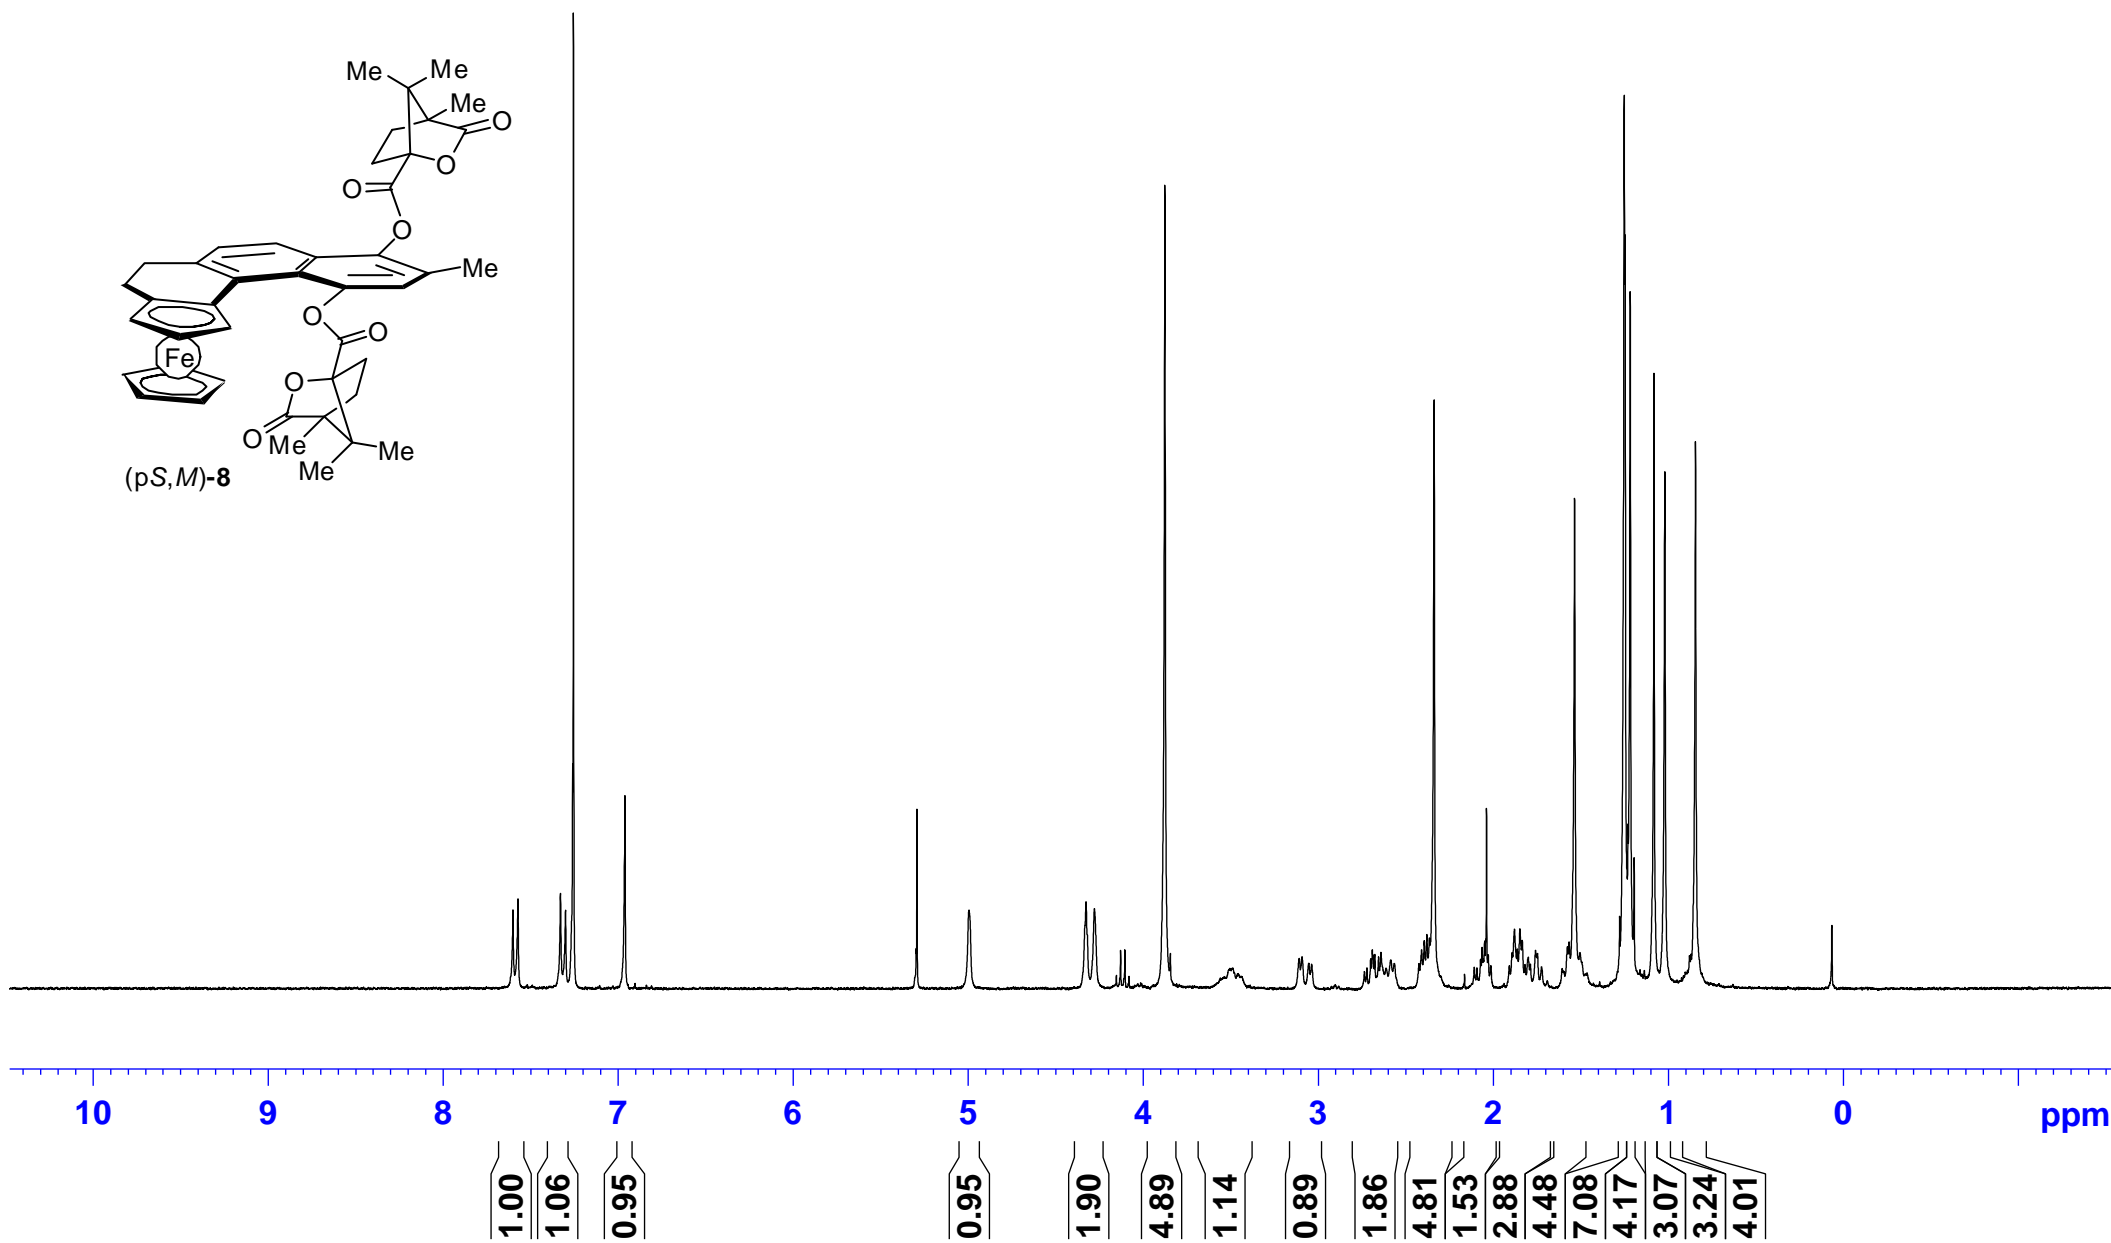

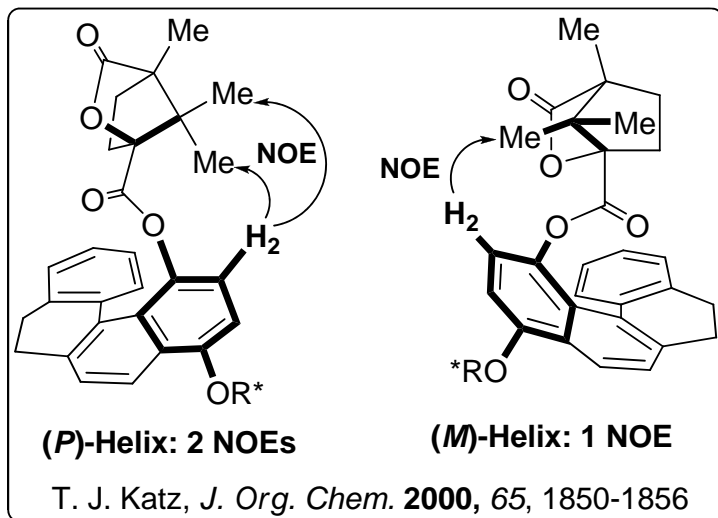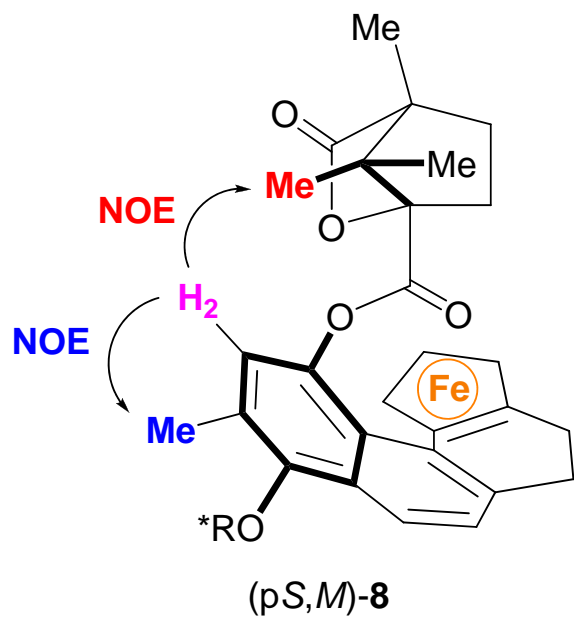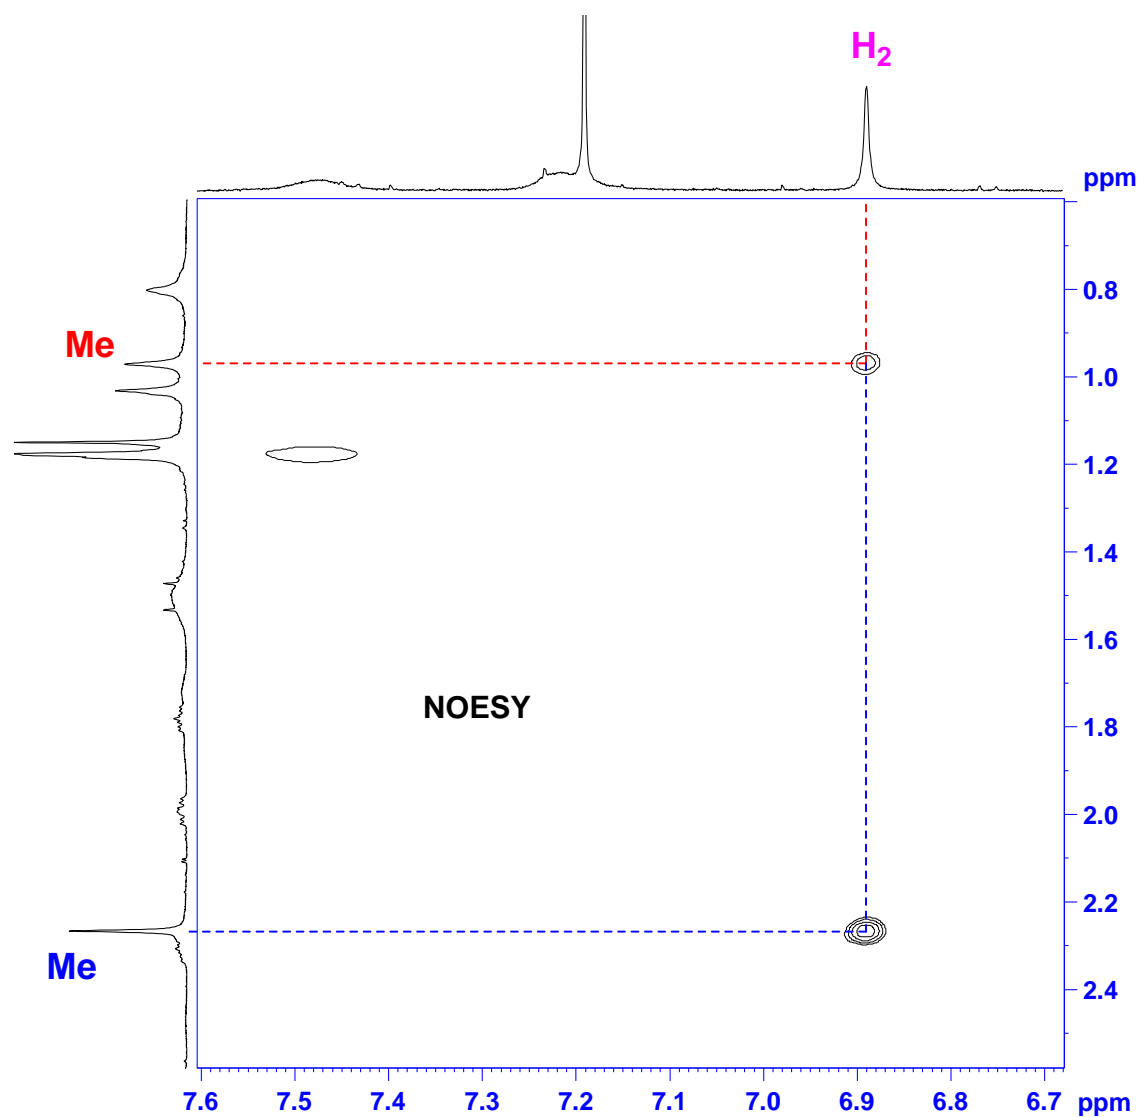

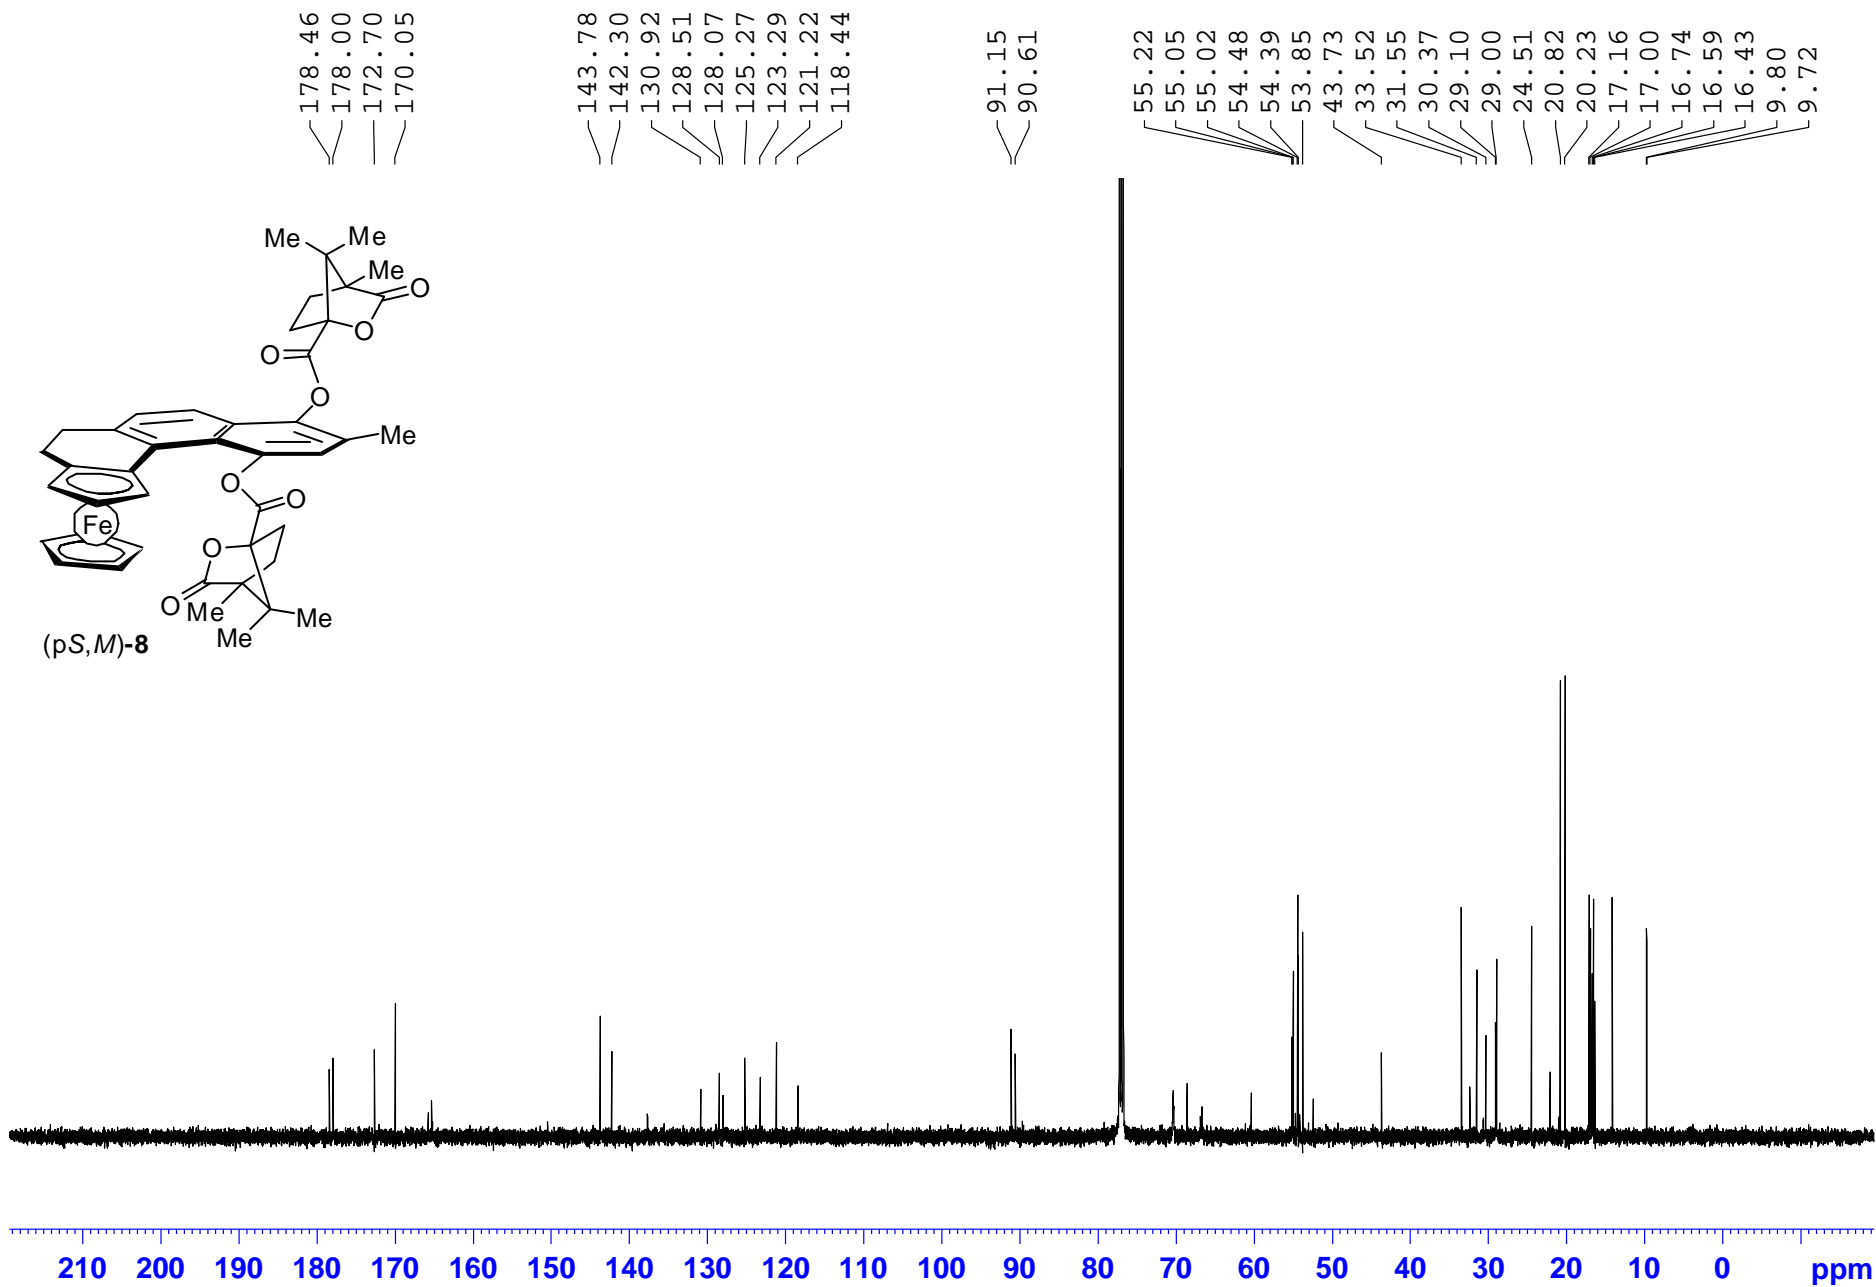

Supplement: c1cc12921j.pdf [file c1cc12921j.pdf]
